# Supplementary material for: Novel Purine Chemotypes with Activity against Plasmodium falciparum and Trypanosoma cruzi
Source: MDPI journal article supplement (doi:10.3390/ph14070638), 2021-07-01
Supplement: s1 [file s1]

**Supporting information.  $^1\text{H}$ -NMR,  $^{13}\text{C}$ -NMR and HRMS data of compounds 1B, 2A, 3F, 4, 4M, 13H, 13ME, 21, 22, 23, 27, 28, 29, MJ-1, MJ-5, MJ-7, MJ-8, MJ-11, MJ-16, MJ-17, MJ-24, 6g, 6D.**  $^1\text{H}$  NMR,  $^{13}\text{C}$  NMR, DEPT 135° and DEPTQ 135° spectra were recorded on a VarianInova Unity (300 MHz), BRUKER Nanobay Avance III HD (400 MHz) or BRUKER Avance NEO (400 or 500 MHz) spec-trometers and were internally referenced using residual protic solvent ( $\text{CDCl}_3$ :  $^1\text{H}$  NMR = 7.26,  $^{13}\text{C}$  NMR = 77.16). Chemical shifts are reported in parts per million (ppm,  $\delta$ ) downfield from tetramethylsilane (TMS). Coupling constants (J) are reported in Hz. Spin multiplicities are described as s (singlet), bs (broad singlet), d (doublet), t (triplet), q (quartet) and m (multiplet) or combinations of these terms. High-resolution mass spectra (HRMS) were recorded on a Waters LCT Premier XE Spectrometer.

*N*,9-Di-*tert*-butyl-8-phenyl-9*H*-purin-6-amine (**1B**).  $^1\text{H}$  NMR (400 MHz,  $\text{CDCl}_3$ )  $\delta$  8.39 (s, 1H), 7.52 – 7.40 (m, 6H), 5.78 (bs, 1H), 1.63 (s, 9H), 1.55 (s, 9H).  $^{13}\text{C}$  NMR (101 MHz,  $\text{CDCl}_3$ )  $\delta$  151.30, 129.95, 129.59, 128.22, 60.46, 52.28, 49.82, 31.03, 29.31. HRMS (ES + ve),  $\text{C}_{19}\text{H}_{26}\text{N}_5$  ( $\text{M} + \text{H}$ ) $^+$ : Calculated 324.2188. Obtained 324.2164.

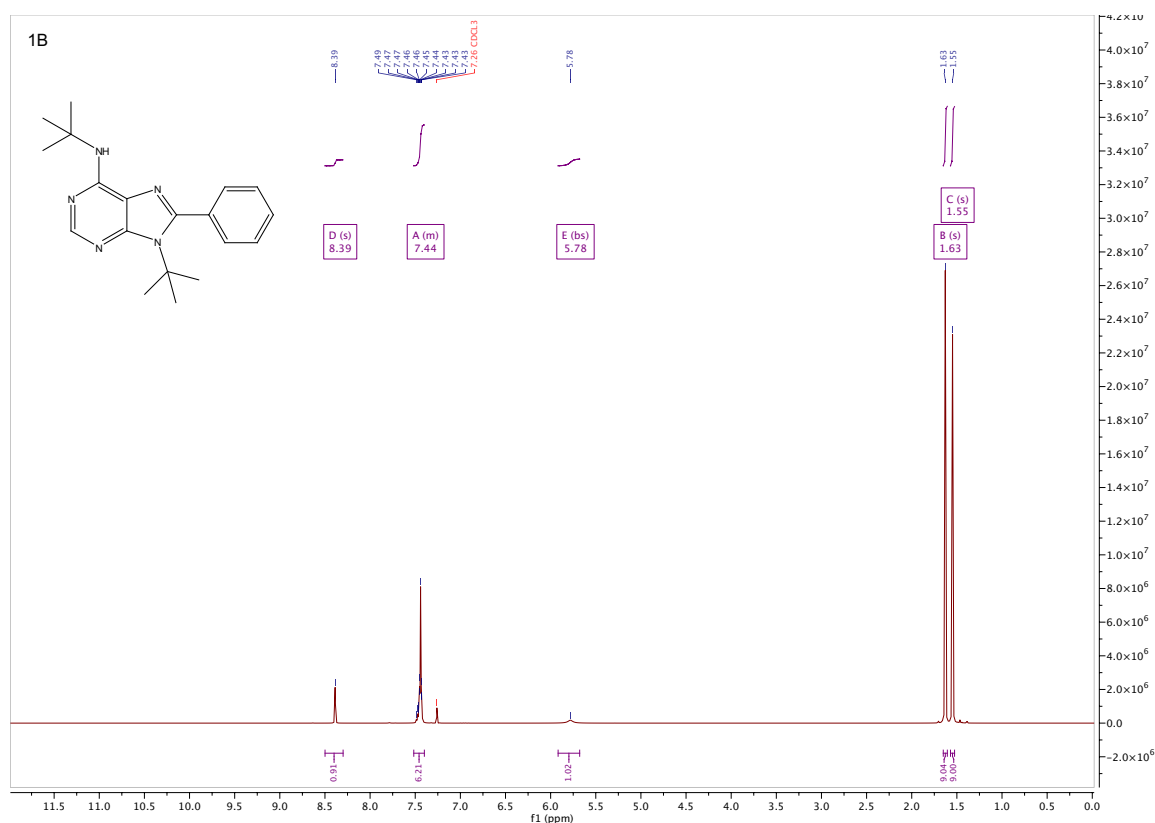

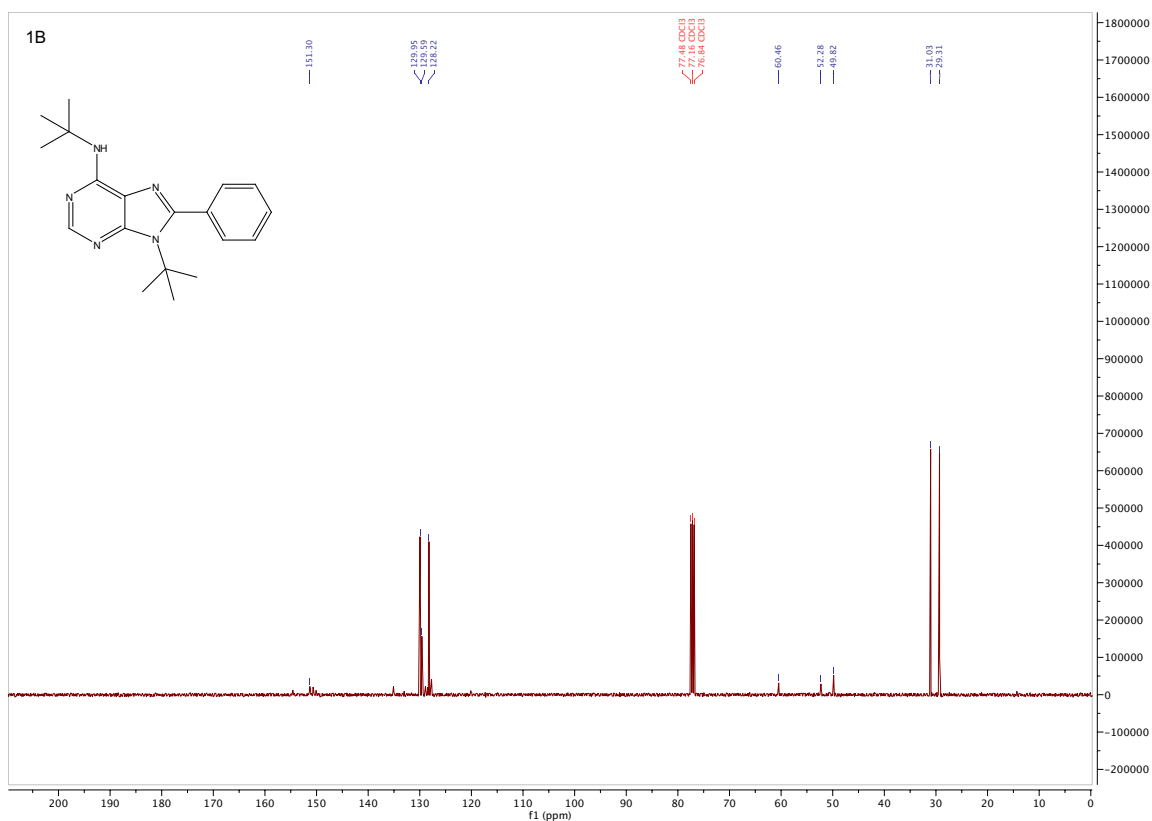

# Elemental Composition Report

Page 1

## Single Mass Analysis

Tolerance = 10.0 PPM / DBE: min = -1.5, max = 50.0

Element prediction: Off

Number of isotope peaks used for i-FIT = 3

Monoisotopic Mass, Even Electron Ions

65 formula(e) evaluated with 2 results within limits (up to 50 best isotopic matches for each mass)

Elements Used:

C: 0-19 H: 0-1000 N: 0-5 Na: 0-1 I: 0-2

MS-01B 41 (0.900) AM (Cen.6, 100.00, Ar.5000.0,0.00,1.00)

1: TOF MS ES+

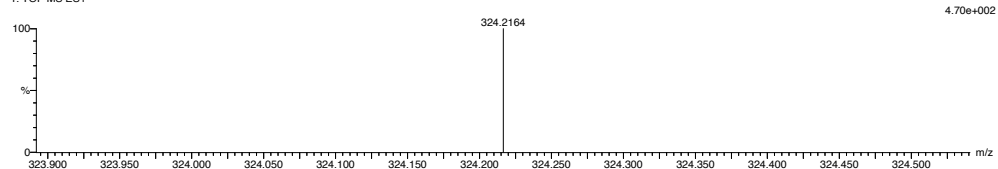

Minimum: -1.5

Maximum: 50.0

| Mass     | Calc. Mass | mDa  | PPM  | DBE | i-FIT | i-FIT (Norm) | Formula       |
|----------|------------|------|------|-----|-------|--------------|---------------|
| 324.2164 | 324.2188   | -2.4 | -7.4 | 9.5 | 23.0  | 1.4          | C19 H26 N5    |
|          | 324.2164   | 0.0  | 0.0  | 6.5 | 21.8  | 0.3          | C17 H27 N5 Na |

*N*,9-Di-*tert*-butyl-8-methyl-9*H*-purin-6-amine (**2A**).  $^1\text{H}$  NMR (400 MHz,  $\text{CDCl}_3$ )  $\delta$  8.30 (s, 1H), 5.69 (bs, 1H), 2.73 (s, 3H), 1.85 (s, 9H), 1.55 (s, 9H).  $^{13}\text{C}$  NMR (101 MHz,  $\text{CDCl}_3$ )  $\delta$  153.90, 151.15, 150.85, 147.99, 123.57, 60.04, 52.20, 30.56, 29.35, 19.99. HRMS (ES + ve),  $\text{C}_{14}\text{H}_{24}\text{N}_5$  ( $\text{M} + \text{H}$ ) $^+$ : Calculated 262.2032. Obtained 262.2029.

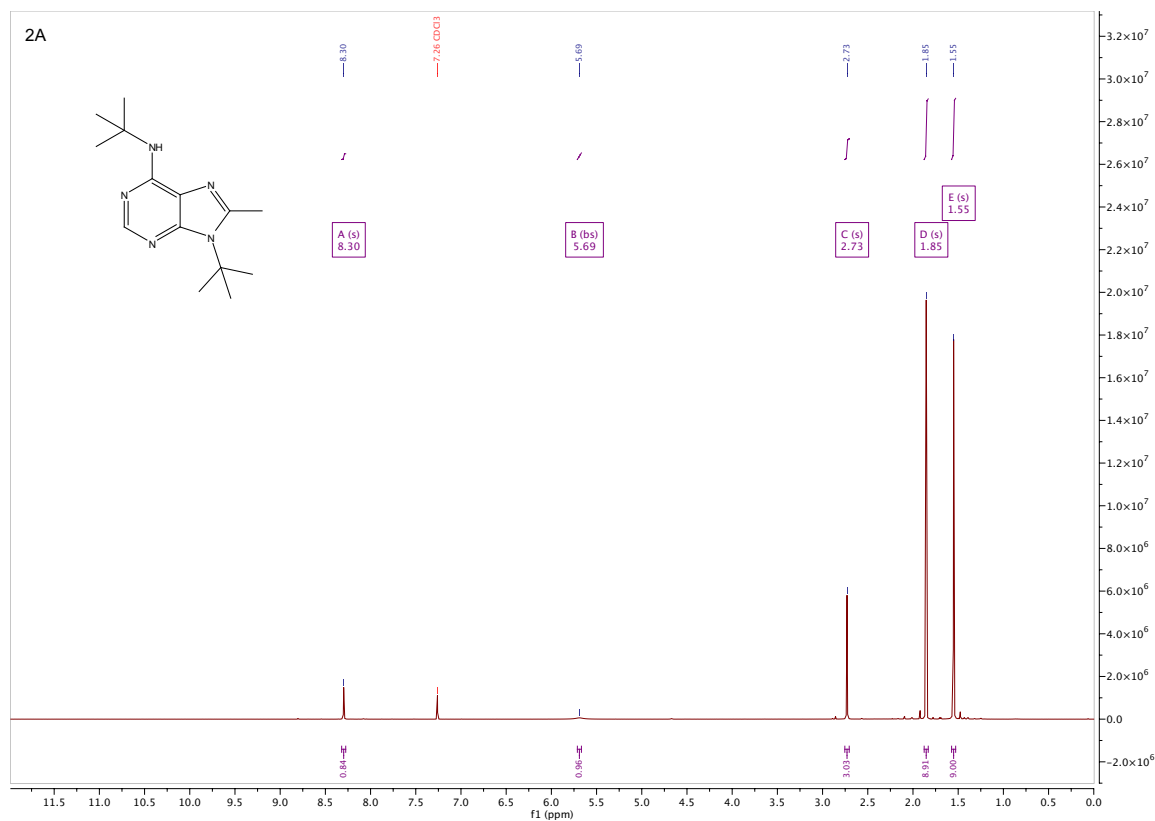

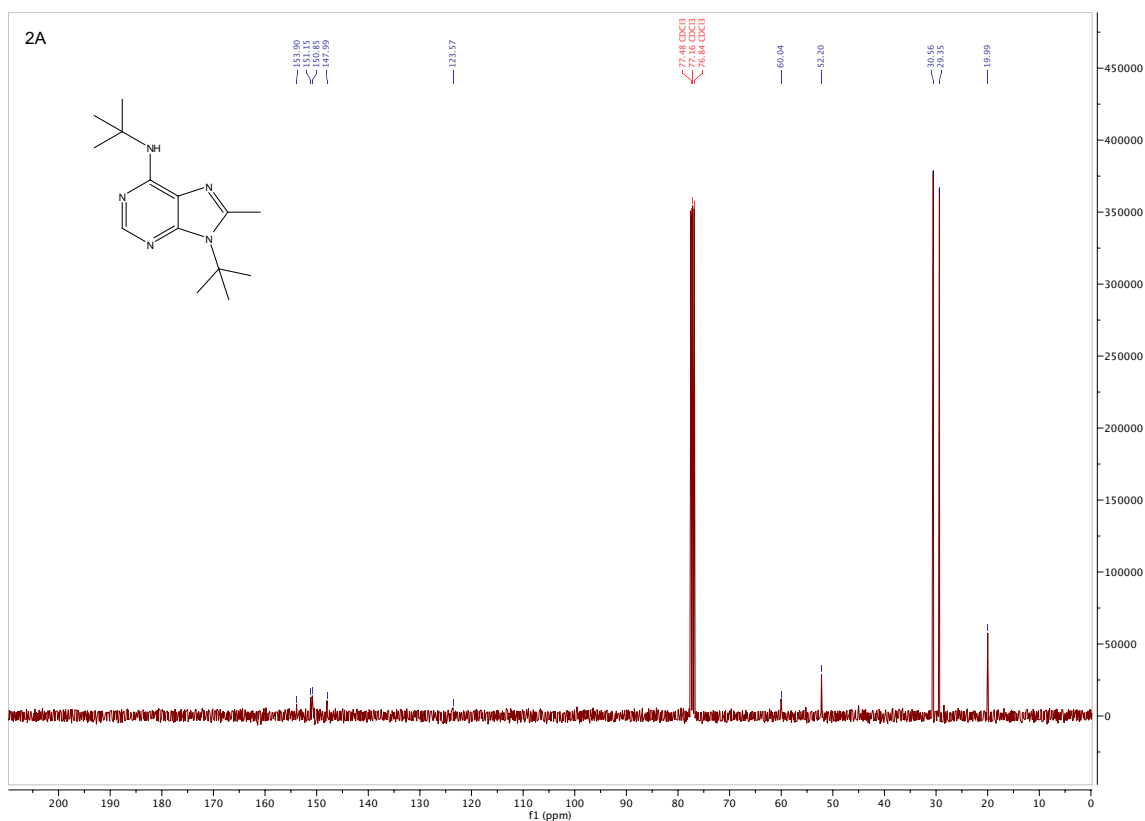

# Elemental Composition Report

Page 1

## Single Mass Analysis

Tolerance = 10.0 PPM / DBE: min = -1.5, max = 50.0

Element prediction: Off

Number of isotope peaks used for i-FIT = 3

Monoisotopic Mass, Even Electron Ions

25 formula(e) evaluated with 2 results within limits (up to 50 best isotopic matches for each mass)

Elements Used:

C: 0-14 H: 0-1000 N: 0-6 Na: 0-1

MJ-d2-2 162 (3.544) AM (Top,1, Ar,5000.0,0.00,1.00)

1: TOF MS ES+

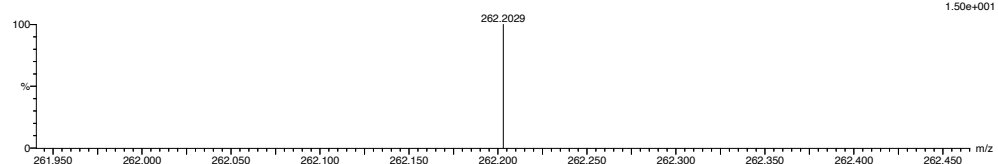

Minimum: -1.5  
Maximum: 5.0 10.0 50.0

| Mass     | Calc. Mass | mDa  | PPM  | DBE | i-FIT | i-FIT (Norm) | Formula       |
|----------|------------|------|------|-----|-------|--------------|---------------|
| 262.2029 | 262.2032   | -0.3 | -1.1 | 5.5 | 12.3  | 0.7          | C14 H24 N5    |
|          | 262.2008   | 2.1  | 8.0  | 2.5 | 12.2  | 0.7          | C12 H25 N5 Na |

*N*,9-Di-*tert*-butyl-9*H*-purin-6-amine (**3F**). <sup>1</sup>H NMR (400 MHz, CDCl<sub>3</sub>) δ 8.34 (s, 1H), 7.76 (s, 1H), 5.71 (bs, 1H), 1.76 (s, 9H), 1.55 (s, 9H). <sup>13</sup>C NMR (101 MHz, CDCl<sub>3</sub>) δ 154.89, 151.62, 149.11, 136.88, 121.68, 57.24, 52.24, 29.30, 29.20. HRMS (ES + ve), C<sub>13</sub>H<sub>22</sub>N<sub>5</sub> (M + H)<sup>+</sup>: Calculated 248.1875. Obtained 248.1862.

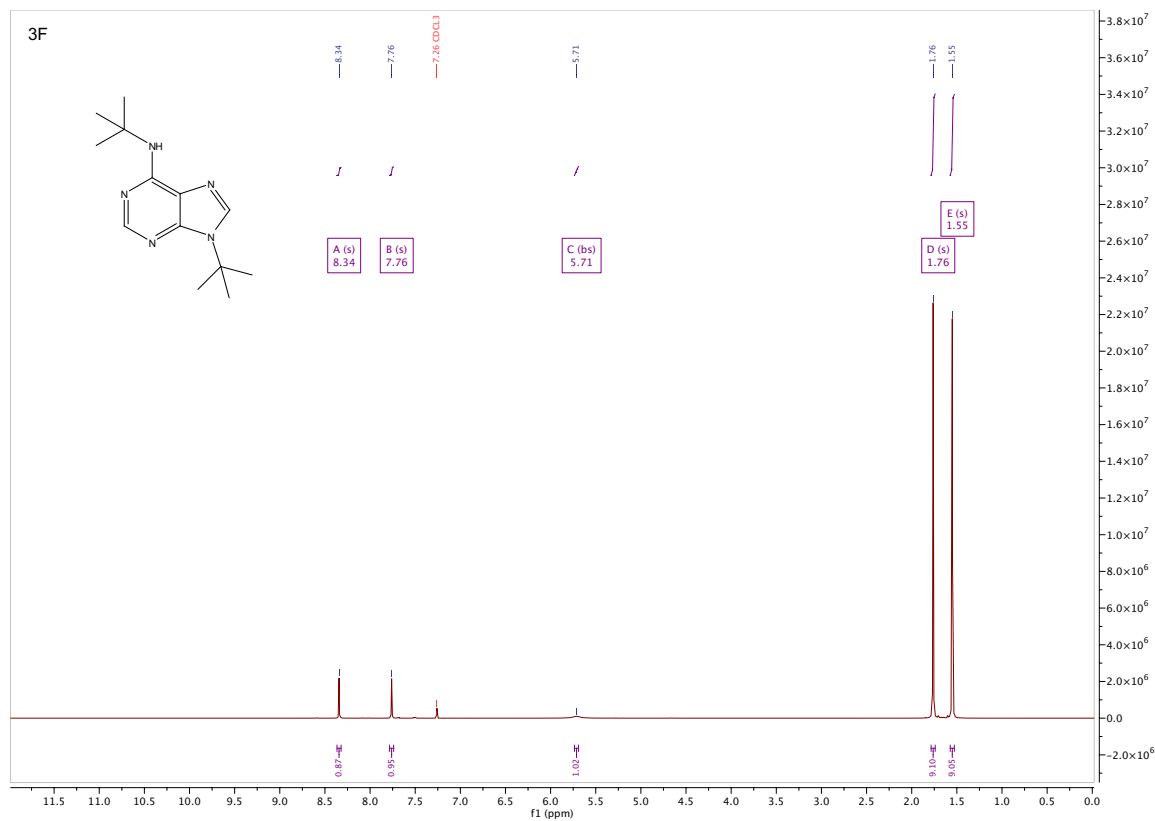

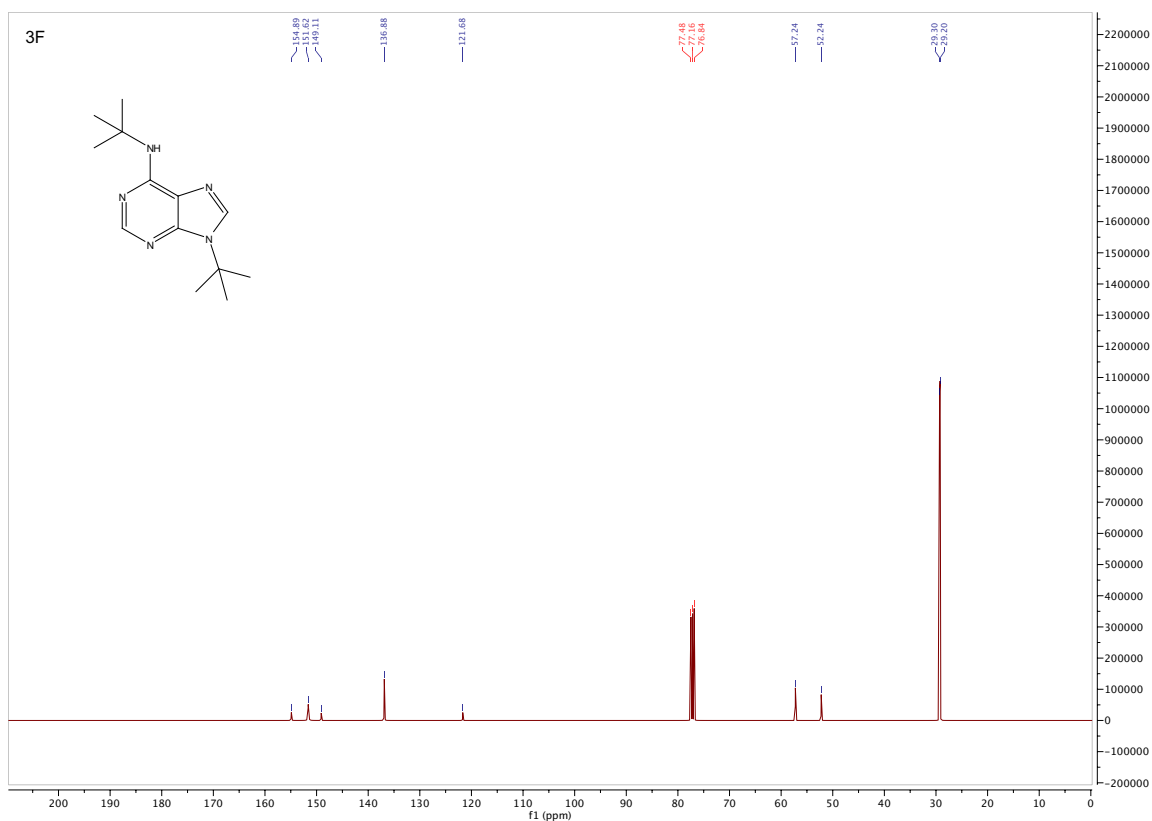

# Elemental Composition Report

Page 1

## Single Mass Analysis

Tolerance = 10.0 PPM / DBE: min = -1.5, max = 50.0

Element prediction: Off

Number of isotope peaks used for i-FIT = 3

Monoisotopic Mass, Even Electron Ions

158 formula(e) evaluated with 2 results within limits (up to 50 best isotopic matches for each mass)

Elements Used:

C: 0-22 H: 0-1000 N: 0-5 O: 0-3 Na: 0-1

MJ-d3 45 (1.006) AM (Top,6, Ar:5000.0:0.00,1.00)

1: TOF MS ES+

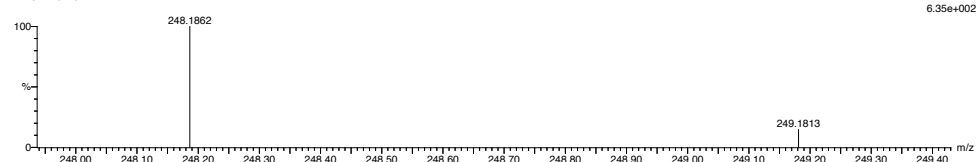

| Minimum: |            |      |      |     |       |              |         |     |       |
|----------|------------|------|------|-----|-------|--------------|---------|-----|-------|
| Maximum: |            |      |      |     |       |              |         |     |       |
|          | 5.0        | 10.0 | -1.5 |     |       |              |         |     |       |
|          |            |      | 50.0 |     |       |              |         |     |       |
| Mass     | Calc. Mass | mDa  | PPM  | DBE | i-FIT | i-FIT (Norm) | Formula |     |       |
| 248.1862 | 248.1875   | -1.3 | -5.2 | 5.5 | 17.1  | 1.8          | C13     | H22 | N5    |
|          | 248.1851   | 1.1  | 4.4  | 2.5 | 15.4  | 0.2          | C11     | H23 | N5 Na |

6-(Benzyloxy)-*N,N*-dimethyl-8-phenyl-9*H*-purin-9-amine (**4**).  $^1\text{H}$  NMR (500 MHz,  $\text{CDCl}_3$ )  $\delta$  8.50 (s, 1H), 8.25 – 8.18 (m, 2H), 7.59 – 7.53 (m, 2H), 7.52 – 7.43 (m, 3H), 7.39 – 7.34 (m, 2H), 7.34 – 7.28 (m, 1H), 5.71 (s, 2H), 3.23 (s, 6H).  $^{13}\text{C}$  NMR (126 MHz,  $\text{CDCl}_3$ )  $\delta$  160.45, 153.26, 151.06, 150.77, 136.51, 130.44, 129.56, 129.19, 128.68, 128.55, 128.37, 128.25, 120.10, 68.41, 45.56. HRMS (ES + ve),  $\text{C}_{20}\text{H}_{20}\text{N}_5\text{O}$  ( $\text{M} + \text{H}$ ) $^+$ : Calculated 346.1668. Obtained 346.1636.

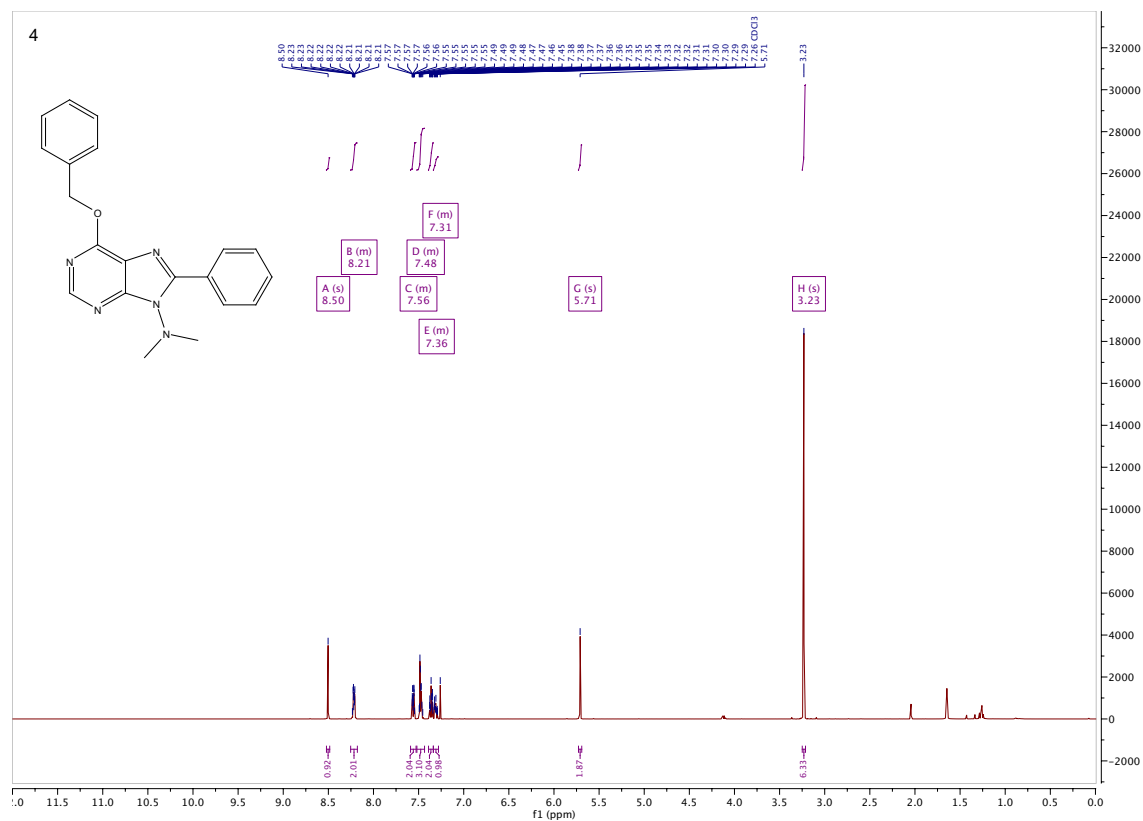

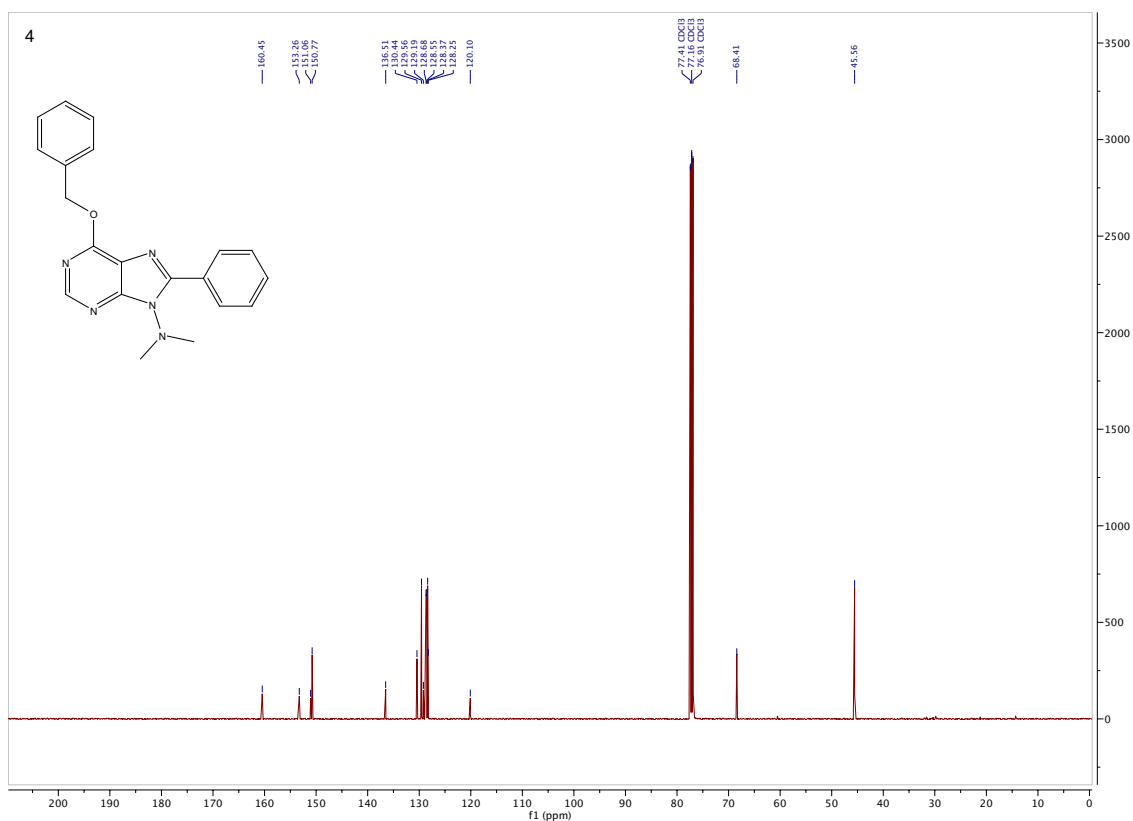

# Elemental Composition Report

Page 1

## Single Mass Analysis

Tolerance = 10.0 PPM / DBE: min = -1.5, max = 50.0

Element prediction: Off

Number of isotope peaks used for i-FIT = 3

Monoisotopic Mass, Even Electron Ions

192 formula(e) evaluated with 2 results within limits (up to 50 best isotopic matches for each mass)

Elements Used:

C: 0-38 H: 0-1000 N: 0-8 O: 0-4

ALM-4-1 12 (0.229) AM (Cen,6, 100.00, Ar,5000.0,0.00,1.00)

1: TOF MS ES+

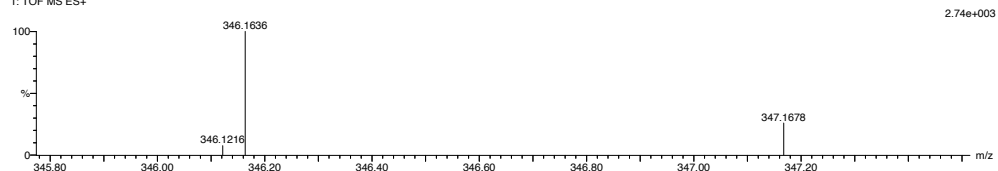

Minimum: -1.5  
Maximum: 50.0

| Mass     | Calc. Mass | mDa  | PPM  | DBE  | i-FIT | i-FIT (Norm) | Formula       |
|----------|------------|------|------|------|-------|--------------|---------------|
| 346.1636 | 346.1668   | -3.2 | -9.2 | 13.5 | 23.9  | 1.5          | C20 H20 N5 O  |
|          | 346.1628   | 0.8  | 2.3  | 9.5  | 22.7  | 0.3          | C15 H20 N7 O3 |



6-(Benzyloxy)-*N,N*,8-trimethyl-9*H*-purin-9-amine (**4M**).  $^1\text{H}$  NMR (400 MHz,  $\text{CDCl}_3$ )  $\delta$  7.89 (s, 1H), 7.37 – 7.25 (m, 5H), 5.24 (s, 2H), 3.06 (s, 6H), 2.48 (s, 3H).  $^{13}\text{C}$  NMR (101 MHz,  $\text{CDCl}_3$ )  $\delta$  156.42, 149.69, 147.64, 145.13, 136.36, 129.07, 128.32, 128.30, 122.10, 49.00, 46.05, 13.30. HRMS (ES + ve),  $\text{C}_{15}\text{H}_{18}\text{N}_5\text{O}$  ( $\text{M} + \text{H}$ ) $^+$ : Calculated 284.1511. Obtained 284.1504.

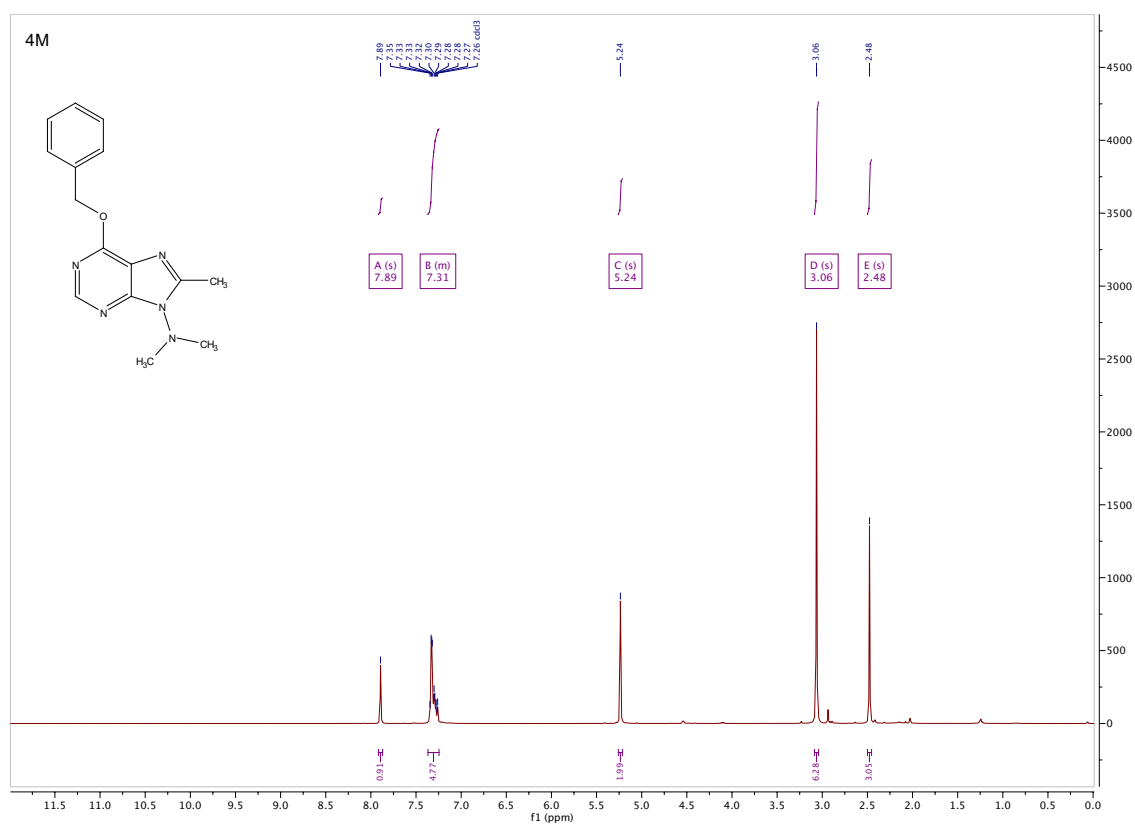

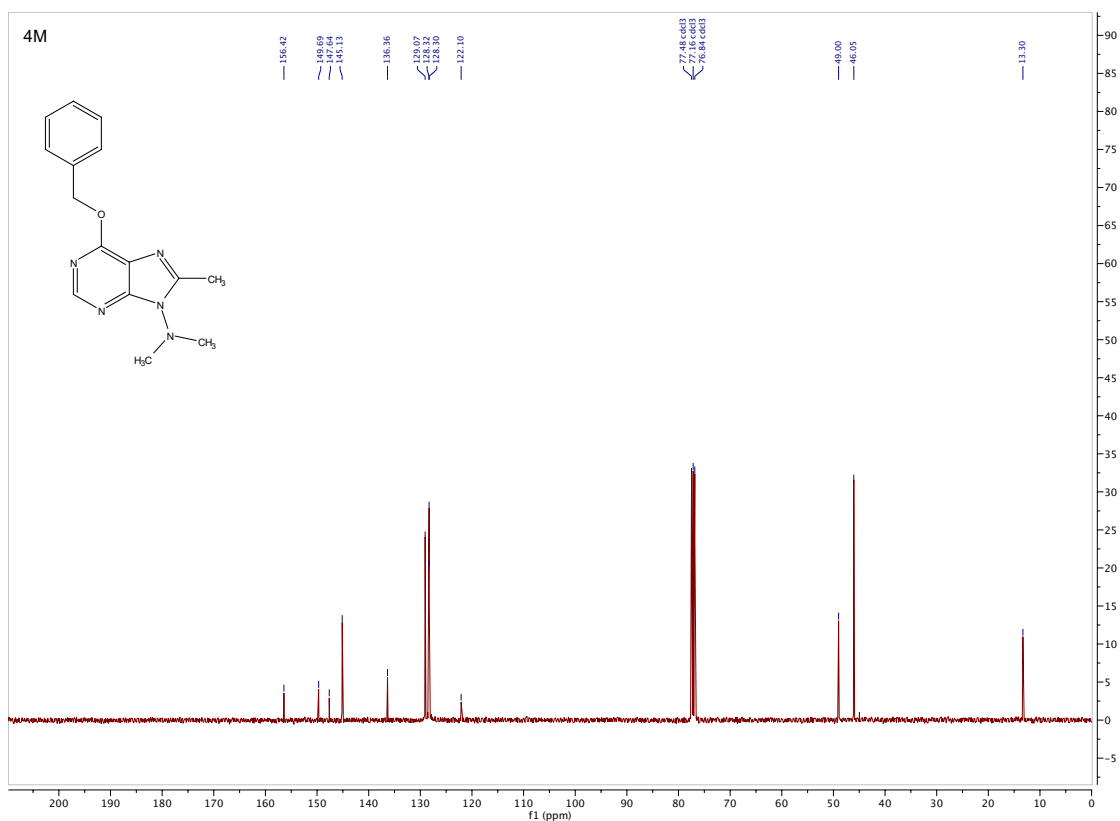

# Elemental Composition Report

Page 1

## Single Mass Analysis

Tolerance = 10.0 PPM / DBE: min = -1.5, max = 50.0

Element prediction: Off

Number of isotope peaks used for i-FIT = 3

Monoisotopic Mass, Even Electron Ions

227 formula(e) evaluated with 2 results within limits (up to 50 closest results for each mass)

Elements Used:

C: 0-19 H: 0-1000 N: 0-6 O: 0-4 Na: 0-1

ALMBP2 12 (0.263) AM (Top,1, Ht,5000,0.0,0.0,1.00)

1: TOF MS ES+

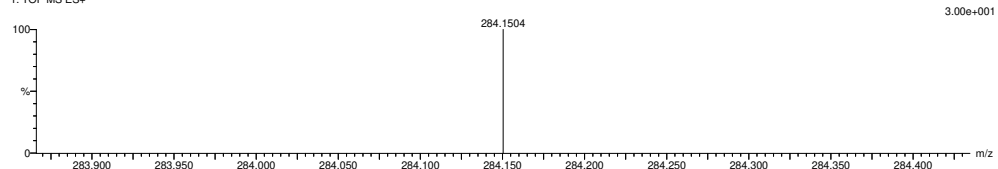

Minimum: -1.5  
Maximum: 5.0 10.0 50.0

| Mass     | Calc. Mass | mDa  | PPM  | DBE | i-FIT | i-FIT (Norm) | Formula         |
|----------|------------|------|------|-----|-------|--------------|-----------------|
| 284.1504 | 284.1511   | -0.7 | -2.5 | 9.5 | 14.5  | 0.9          | C15 H18 N5 O    |
|          | 284.1487   | 1.7  | 6.0  | 6.5 | 14.2  | 0.6          | C13 H19 N5 O Na |

6-(Benzyloxy)-9-(piperidin-1-yl)-9*H*-purine (**13H**). <sup>1</sup>H NMR (400 MHz, CDCl<sub>3</sub>) δ 7.98 (s, 1H), 7.87 (s, 1H), 7.39 – 7.24 (m, 5H), 5.24 (s, 2H), 3.39 – 3.32 (m, 4H), 1.83 – 1.73 (m, 4H), 1.60 – 1.50 (m, 2H). <sup>13</sup>C NMR (101 MHz, CDCl<sub>3</sub>) δ 156.75, 146.81, 146.31, 139.35, 136.15, 129.12, 128.42, 128.32, 123.46, 56.50, 49.22, 26.16, 23.18. HRMS (ES + ve), C<sub>17</sub>H<sub>20</sub>N<sub>5</sub>O (M + H)<sup>+</sup>: Calculated 310.1668. Obtained 310.1680.

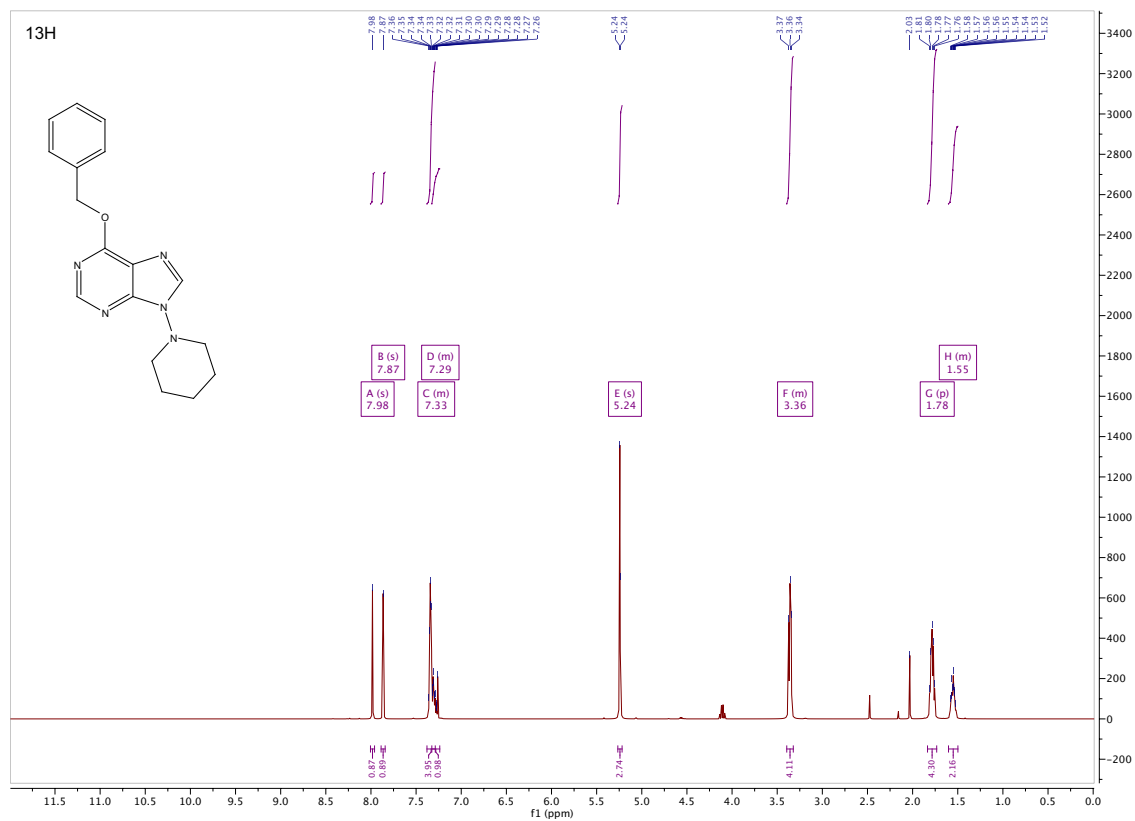

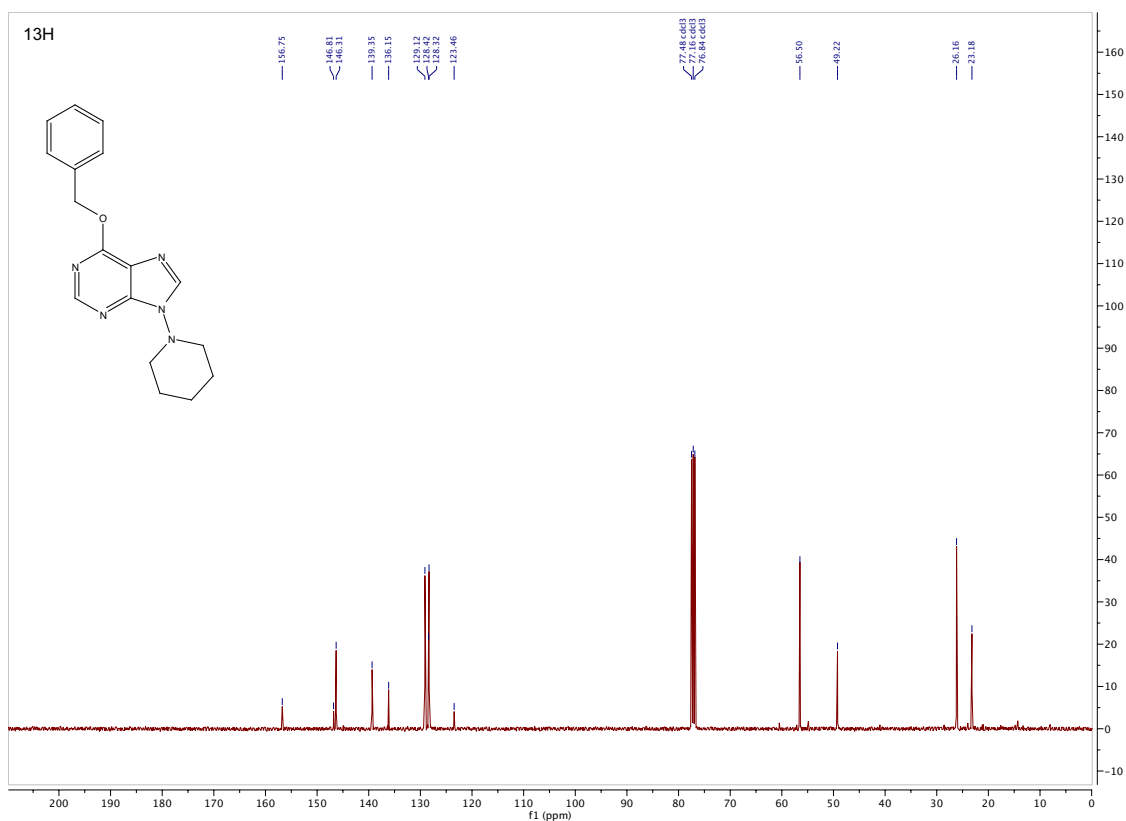

# Elemental Composition Report

Page 1

## Single Mass Analysis

Tolerance = 10.0 PPM / DBE: min = -1.5, max = 50.0

Element prediction: Off

Number of isotope peaks used for i-FIT = 3

Monoisotopic Mass, Even Electron Ions

213 formula(e) evaluated with 1 results within limits (up to 50 closest results for each mass)

Elements Used:

C: 0-19 H: 0-1000 N: 0-6 O: 0-4 Na: 0-1

ALM10P3 29 (0.599) AM (Top.1, Ht.5000.0.0.0.1.00)

1: TOF MS ES+

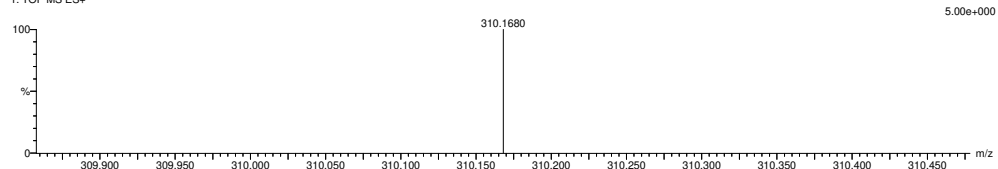

Minimum: -1.5  
Maximum: 5.0 10.0 50.0

| Mass     | Calc. Mass | mDa | PPM | DBE  | i-FIT | i-FIT (Norm) | Formula      |
|----------|------------|-----|-----|------|-------|--------------|--------------|
| 310.1680 | 310.1668   | 1.2 | 3.9 | 10.5 | 12.3  | 0.0          | C17 H20 N5 O |

6-(Benzyloxy)-8-methyl-9-(piperidin-1-yl)-9*H*-purine (**13ME**).  $^1\text{H}$  NMR (400 MHz,  $\text{CDCl}_3$ )  $\delta$  7.88 (s, 1H), 7.37 – 7.24 (m, 5H), 5.23 (s, 2H), 3.75 – 3.67 (m, 2H), 3.10 – 3.04 (m, 2H), 2.48 (s, 3H), 1.86 – 1.62 (m, 6H).  $^{13}\text{C}$  NMR (101 MHz,  $\text{CDCl}_3$ )  $\delta$  156.43, 149.88, 147.81, 144.95, 136.36, 129.07, 128.33, 128.31, 121.94, 54.86, 48.99, 26.44, 23.24, 13.28. HRMS (ES + ve),  $\text{C}_{18}\text{H}_{22}\text{N}_5\text{O}$  ( $\text{M} + \text{H}$ ) $^+$ : Calculated 324.1824. Obtained 324.1844.

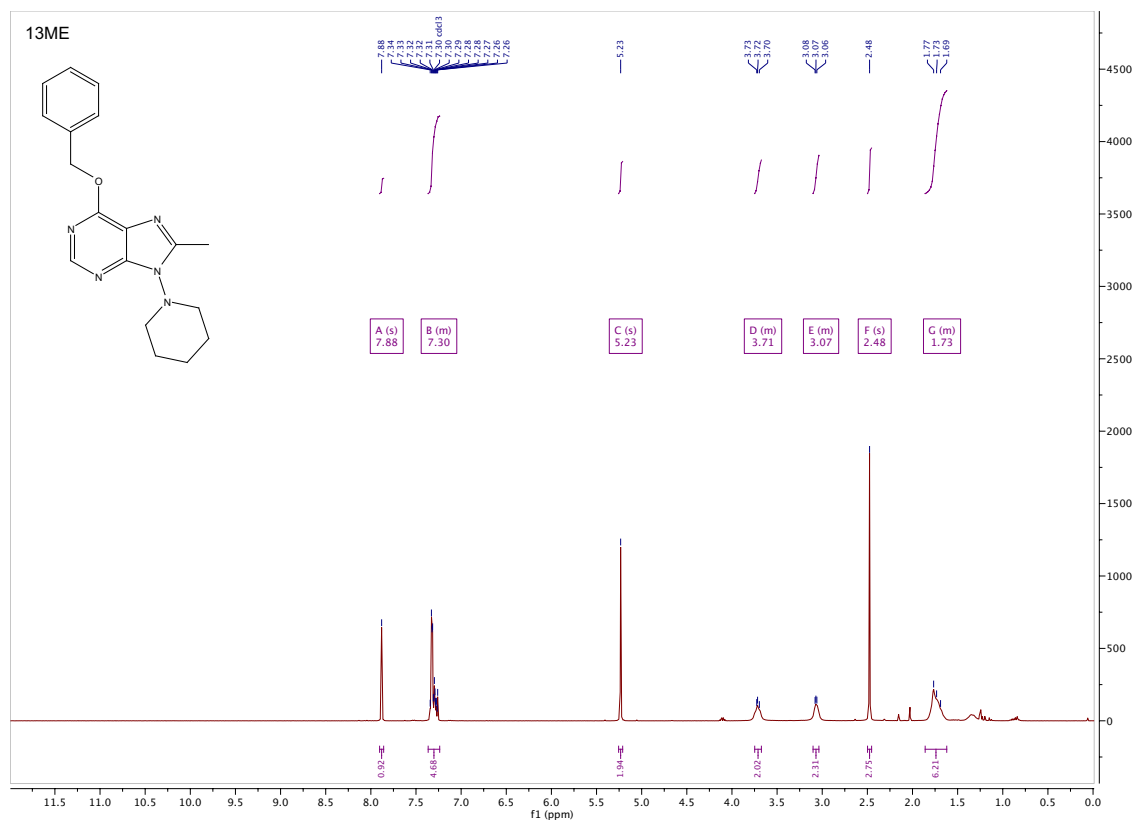

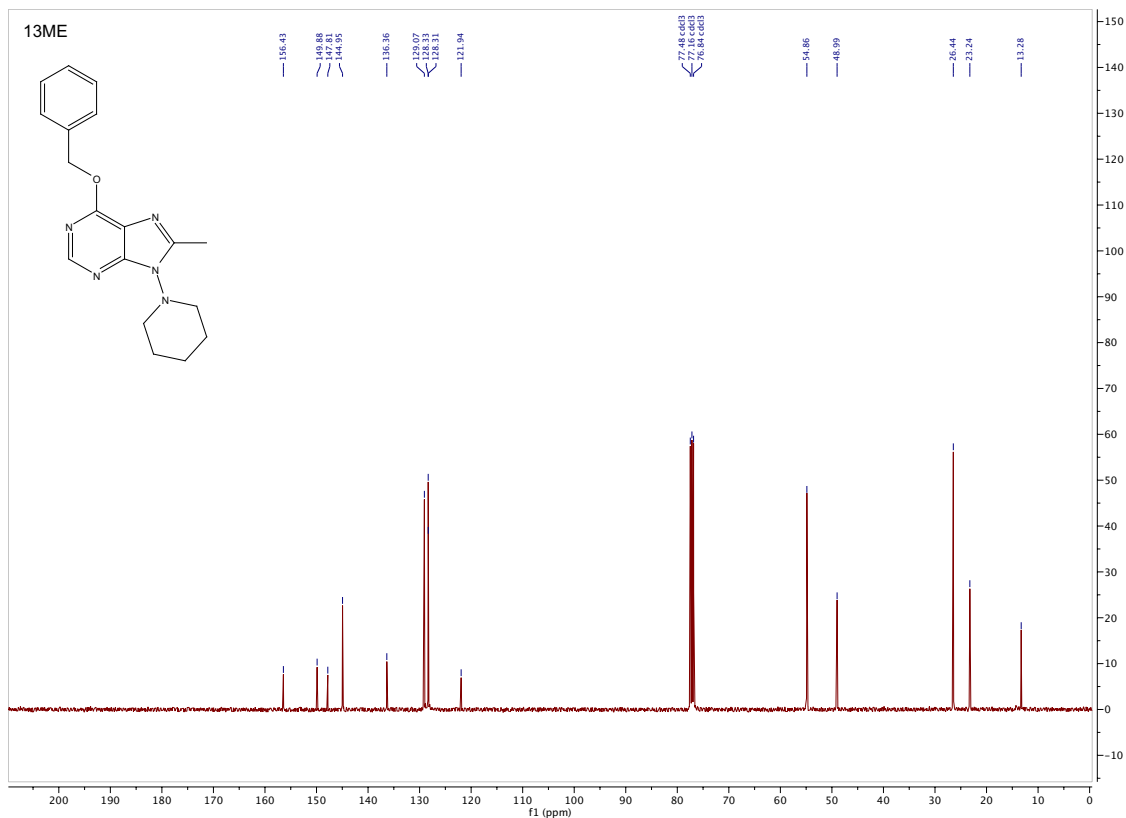

# Elemental Composition Report

Page 1

## Single Mass Analysis

Tolerance = 10.0 PPM / DBE: min = -1.5, max = 50.0

Element prediction: Off

Number of isotope peaks used for i-FIT = 3

Monoisotopic Mass, Even Electron Ions

315 formula(e) evaluated with 2 results within limits (up to 50 closest results for each mass)

Elements Used:

C: 0-18 H: 0-1000 N: 0-5 O: 0-9 Na: 0-1

ALM10P2 136 (2.961) AM (Top,1, H1,5000.0,0.00,1.00)

1: TOF MS ES+

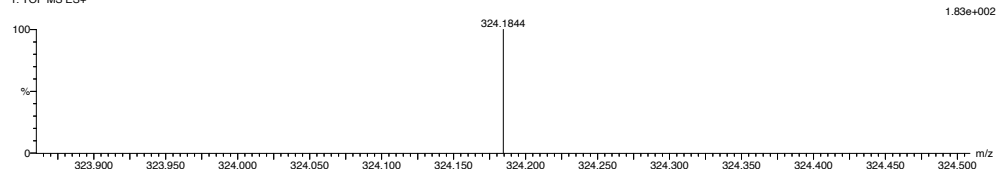

Minimum: -1.5  
Maximum: 5.0 10.0 50.0

| Mass     | Calc. Mass | mDa  | PPM  | DBE  | i-FIT | i-FIT (Norm) | Formula         |
|----------|------------|------|------|------|-------|--------------|-----------------|
| 324.1844 | 324.1824   | 2.0  | 6.2  | 10.5 | 20.1  | 1.3          | C18 H22 N5 O    |
|          | 324.1859   | -1.5 | -4.6 | -1.5 | 19.1  | 0.3          | C9 H27 N5 O6 Na |

4-(6-(Benzyloxy)-8-phenyl-9*H*-purin-9-yl)morpholine (**21**). <sup>1</sup>H NMR (500 MHz, ) δ 8.50 (s, 1H), 8.25 – 8.17 (m, 2H), 7.59 – 7.53 (m, 2H), 7.49 (dd, *J* = 5.2, 2.0 Hz, 3H), 7.40 – 7.34 (m, 2H), 7.34 – 7.27 (m, 1H), 5.71 (s, 2H), 4.39 (s, 2H), 3.92 (t, *J* = 48.4 Hz, 4H), 3.06 (s, 2H). <sup>13</sup>C NMR (126 MHz, CDCl<sub>3</sub>) δ 160.50, 153.29, 150.97, 150.91, 136.44, 130.53, 129.58, 128.98, 128.71, 128.55, 128.37, 128.27, 119.96, 68.46, 67.17, 53.46. HRMS (ES + ve), C<sub>22</sub>H<sub>22</sub>N<sub>5</sub>O<sub>2</sub> (M + H)<sup>+</sup>: Calculated 388.1774. Obtained 388.1761.

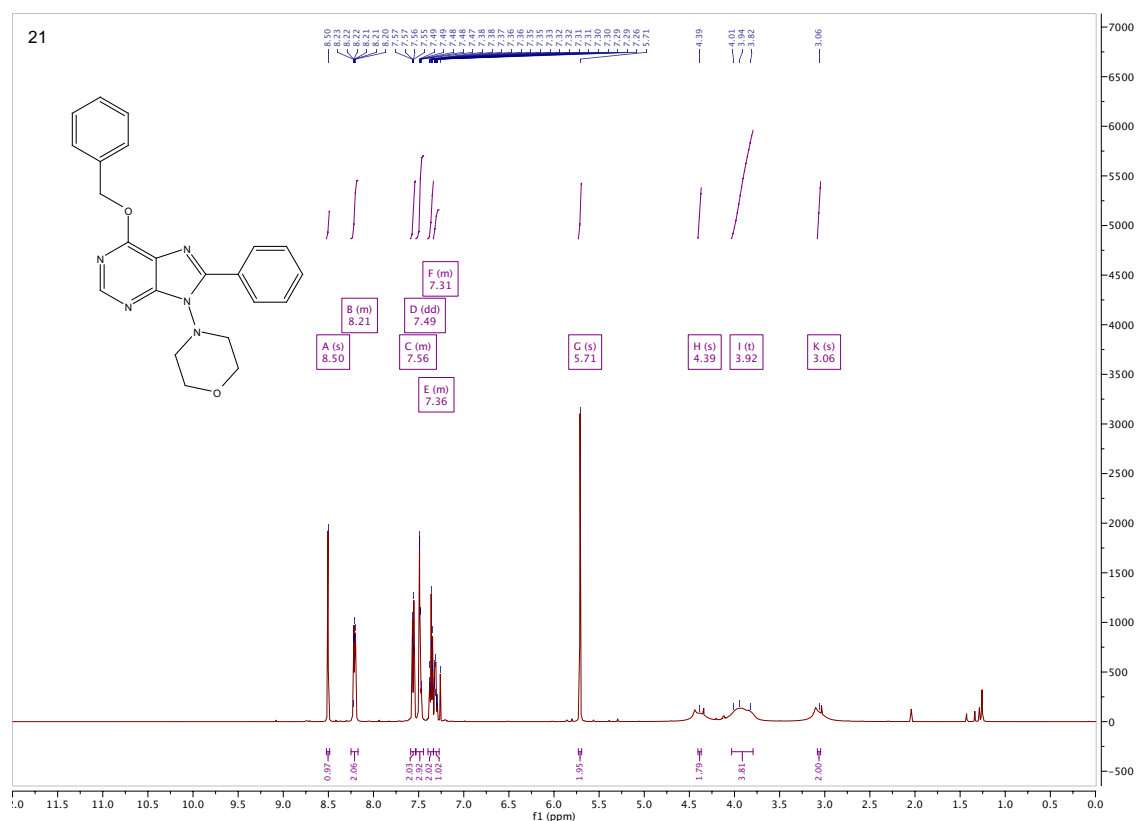

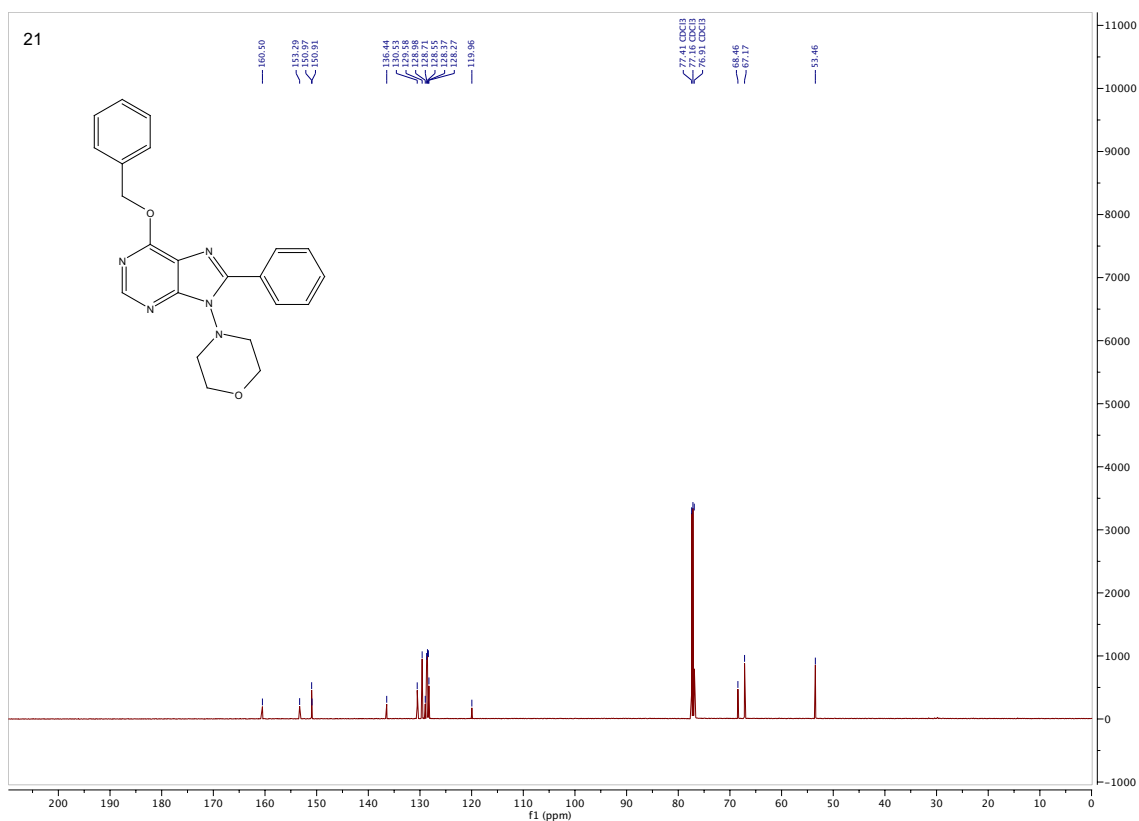

# Elemental Composition Report

Page 1

## Single Mass Analysis

Tolerance = 10.0 PPM / DBE: min = -1.5, max = 50.0

Element prediction: Off

Number of isotope peaks used for i-FIT = 3

Monoisotopic Mass, Even Electron Ions

216 formula(e) evaluated with 2 results within limits (up to 50 best isotopic matches for each mass)

Elements Used:

C: 0-38 H: 0-1000 N: 0-8 O: 0-4

ALM-21-1 69 (1.533) AM (Top.6, Ar.5000.0,0.00,1.00)

1: TOF MS ES+

8.52e+002

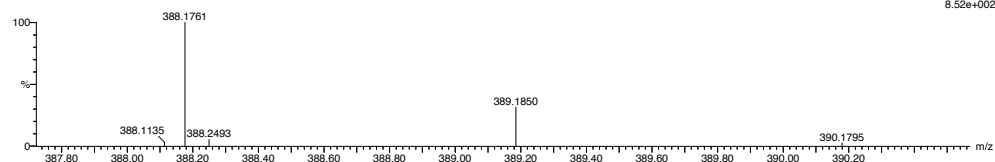

Minimum: -1.5  
Maximum: 5.0 10.0 50.0

| Mass     | Calc. Mass | mDa  | PPM  | DBE  | i-FIT | i-FIT (Norm) | Formula       |
|----------|------------|------|------|------|-------|--------------|---------------|
| 388.1761 | 388.1774   | -1.3 | -3.3 | 14.5 | 19.7  | 0.1          | C22 H22 N5 O2 |
|          | 388.1733   | 2.8  | 7.2  | 10.5 | 22.1  | 2.4          | C17 H22 N7 O4 |



4-(6-(Benzyloxy)-8-methyl-9*H*-purin-9-yl)morpholine (**22**).  $^1\text{H}$  NMR (500 MHz,  $\text{CDCl}_3$ )  $\delta$  8.44 (s, 1H), 7.55 – 7.49 (m, 2H), 7.40 – 7.30 (m, 2H), 7.33 – 7.24 (m, 1H), 5.63 (s, 2H), 4.21 (s, 2H), 4.02 – 3.74 (m, 4H), 2.94 (bs, 2H), 2.57 (s, 3H).  $^{13}\text{C}$  NMR (126 MHz,  $\text{CDCl}_3$ )  $\delta$  159.77, 152.36, 152.14, 150.53, 136.37, 128.60, 128.52, 128.21, 119.12, 68.31, 67.21, 53.65, 13.59. HRMS (ES + ve),  $\text{C}_{17}\text{H}_{20}\text{N}_5\text{O}_2$  ( $\text{M} + \text{H}$ ) $^+$ : Calculated 326.1588. Obtained 326.1617.

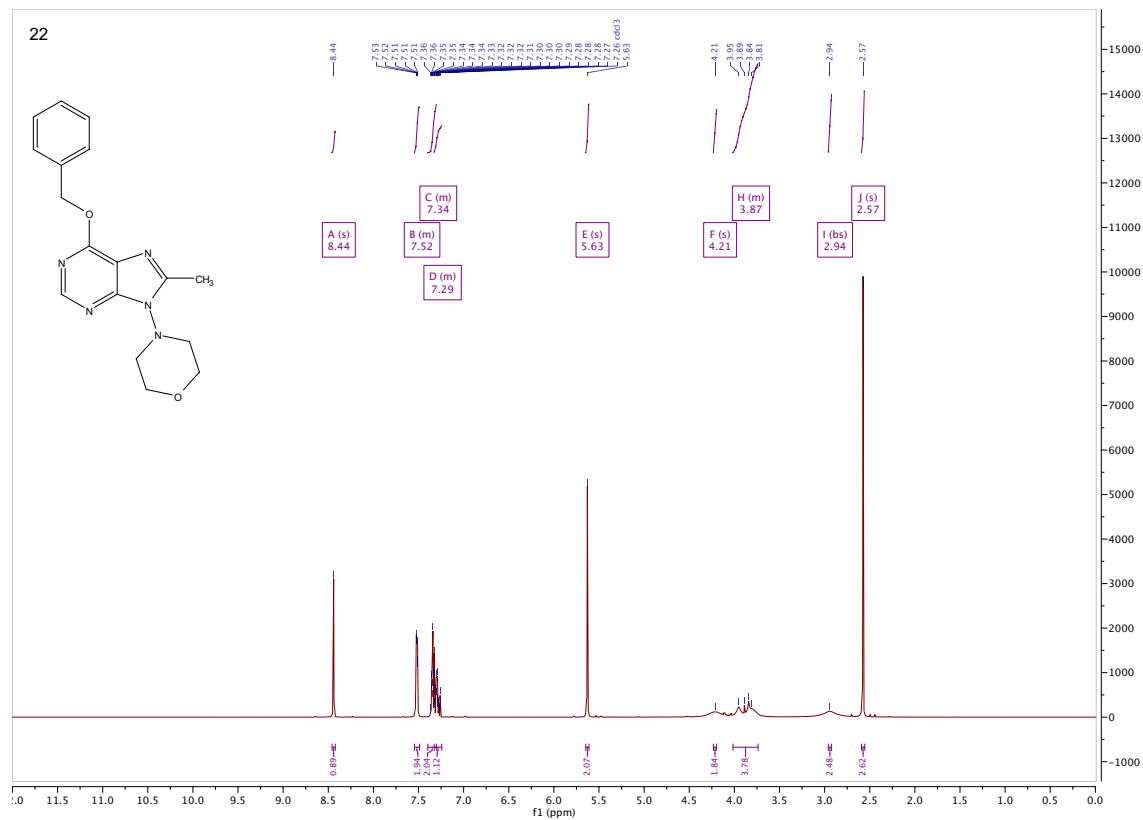

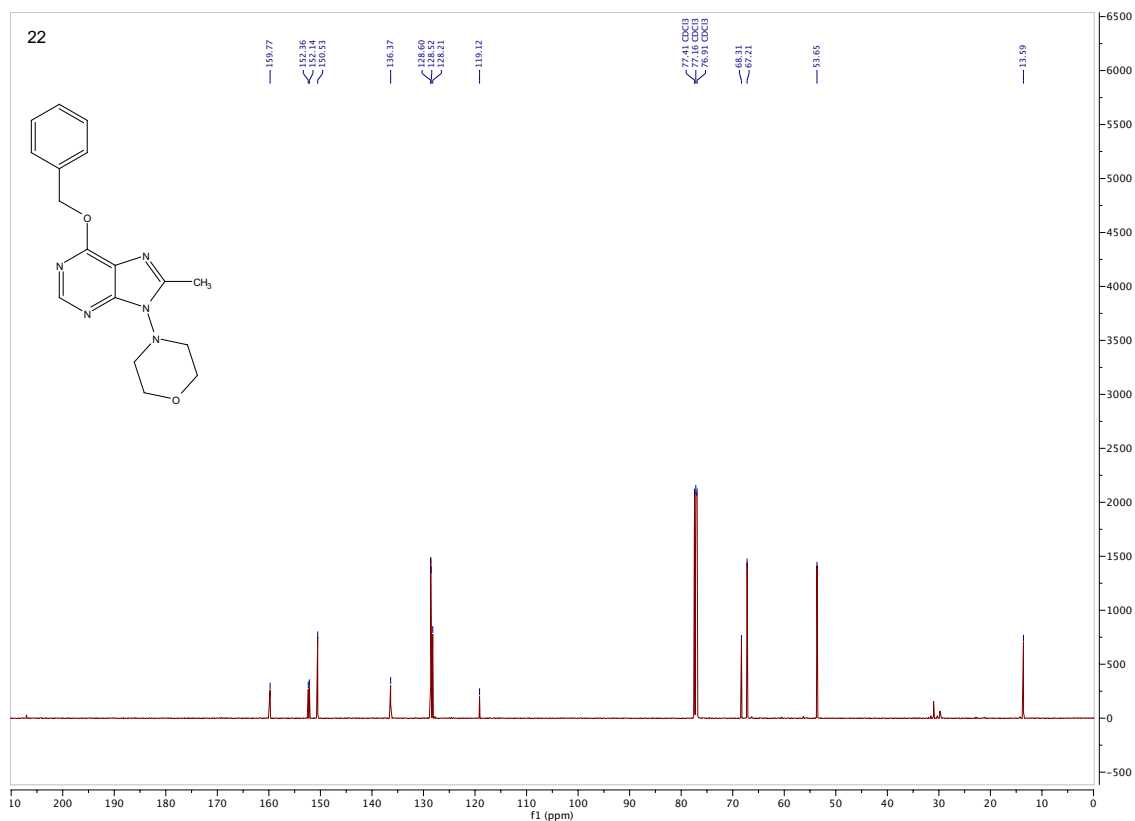

# Elemental Composition Report

Page 1

## Single Mass Analysis

Tolerance = 10.0 PPM / DBE: min = -1.5, max = 50.0

Element prediction: Off

Number of isotope peaks used for i-FIT = 3

Monoisotopic Mass, Even Electron Ions

174 formula(e) evaluated with 2 results within limits (up to 50 best isotopic matches for each mass)

Elements Used:

C: 0-23 H: 0-1000 N: 0-8 O: 0-4

ALM-22-1.4 (0.070) AM (Cen,6, 100.00, Ar,5000.0,0.00,1.00)

1: TOF MS ES+

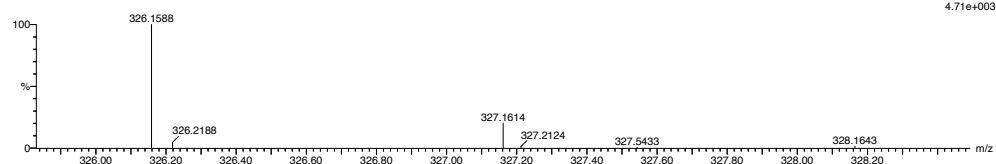

Minimum: -1.5  
Maximum: 5.0 10.0 50.0

| Mass     | Calc. Mass | mDa  | PPM  | DBE  | i-FIT | i-FIT (Norm) | Formula       |
|----------|------------|------|------|------|-------|--------------|---------------|
| 326.1588 | 326.1617   | -2.9 | -8.9 | 10.5 | 37.0  | 2.0          | C17 H20 N5 O2 |
|          | 326.1577   | 1.1  | 3.4  | 6.5  | 35.1  | 0.1          | C12 H20 N7 O4 |

4-(6-(Benzyloxy)-9H-purin-9-yl)morpholine (**23**).  $^1\text{H}$  NMR (500 MHz,  $\text{CDCl}_3$ )  $\delta$  8.52 (s, 1H), 8.01 (s, 1H), 7.56 – 7.50 (m, 2H), 7.39 – 7.33 (m, 2H), 7.33 – 7.27 (m, 1H), 5.66 (s, 2H), 3.90 (t,  $J = 4.7$  Hz, 4H), 3.58 – 3.52 (m, 4H).  $^{13}\text{C}$  NMR (126 MHz,  $\text{CDCl}_3$ )  $\delta$  160.89, 151.75, 151.18, 141.78, 136.22, 128.56, 128.48, 128.27, 120.72, 68.49, 66.98, 55.00. HRMS (ES + ve),  $\text{C}_{16}\text{H}_{18}\text{N}_5\text{O}_2$  ( $\text{M} + \text{H}$ ) $^+$ : Calculated 312.1461. Obtained 312.1434.

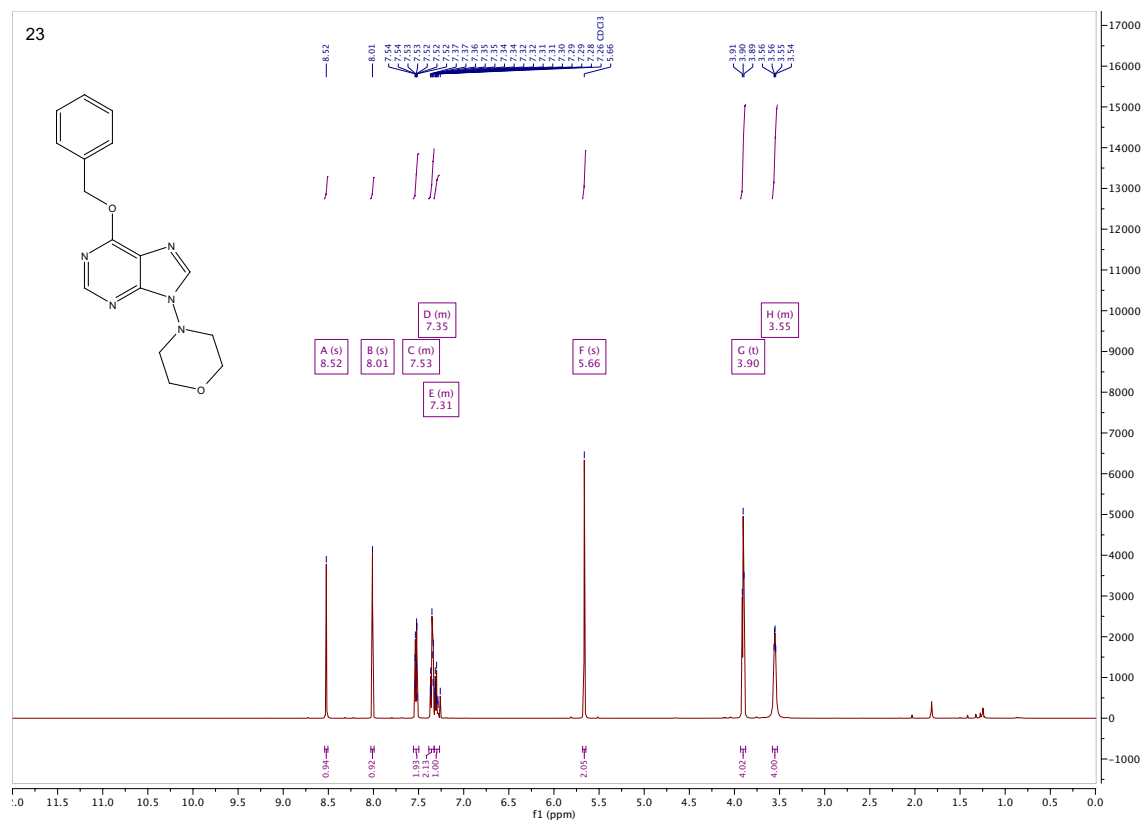



6-(Benzyloxy)-9-(4-methylpiperazin-1-yl)-8-phenyl-9*H*-purine (**27**).  $^1\text{H}$  NMR (500 MHz,  $\text{CDCl}_3$ )  $\delta$  8.47 (s, 1H), 8.29 – 8.19 (m, 2H), 7.58 – 7.52 (m, 2H), 7.52 – 7.43 (m, 3H), 7.38 – 7.33 (m, 2H), 7.32 – 7.27 (m, 1H), 5.70 (s, 2H), 4.46 – 4.31 (m, 2H), 3.24 – 2.76 (m, 6H), 2.37 (s, 3H).  $^{13}\text{C}$  NMR (126 MHz,  $\text{CDCl}_3$ )  $\delta$  160.40, 153.45, 151.02, 150.86, 136.48, 130.42, 129.58, 129.04, 128.68, 128.52, 128.30, 128.22, 119.93, 68.38, 55.20, 52.63, 45.96. HRMS (ES + ve),  $\text{C}_{23}\text{H}_{25}\text{N}_6\text{O}$  ( $\text{M} + \text{H}$ ) $^+$ : Calculated 401.2090. Obtained 401.2070.

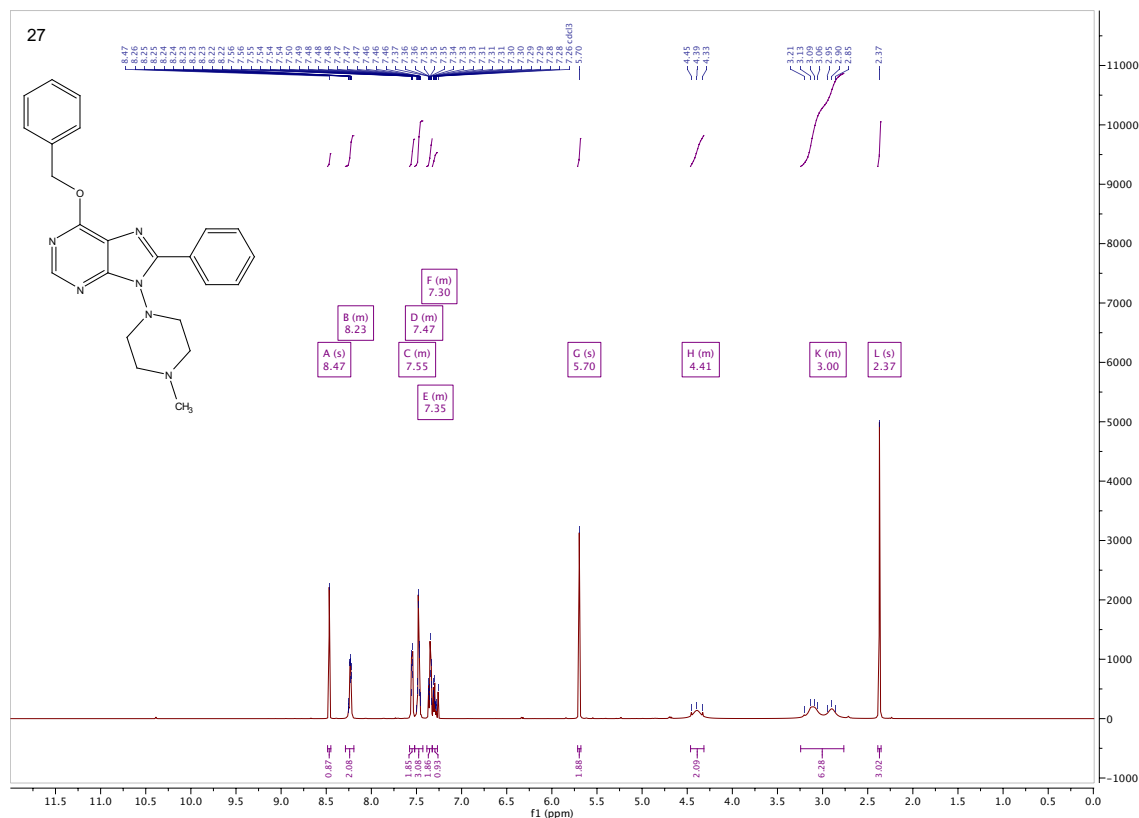

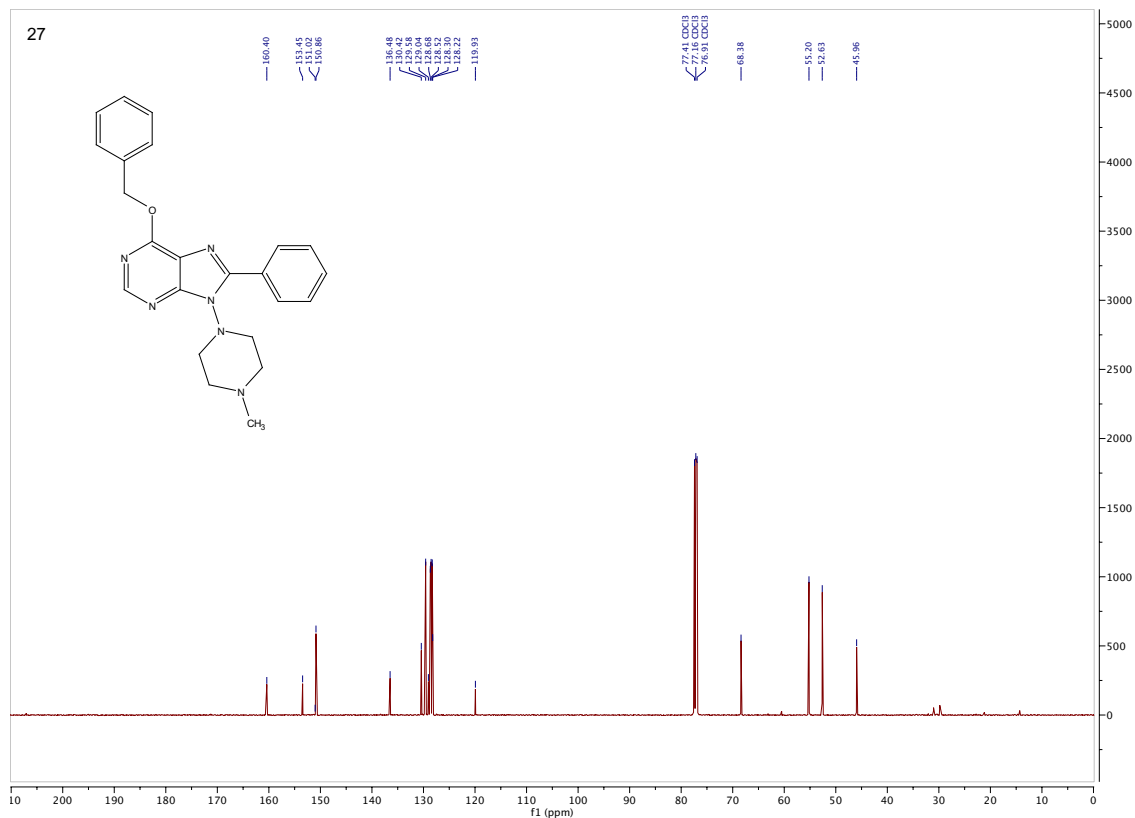

#### Elemental Composition Report

Page 1

#### Single Mass Analysis

Tolerance = 10.0 PPM / DBE: min = -1.5, max = 50.0

Element prediction: Off

Number of isotope peaks used for i-FIT = 3

Monoisotopic Mass, Even Electron Ions

767 formula(e) evaluated with 7 results within limits (up to 50 best isotopic matches for each mass)

Elements Used:

C: 0-23 H: 0-1000 N: 0-8 O: 0-4 S: 0-4

ALM-27-1 13 (0.283) AM (Cen,6, 100.00, Ar,5000.0,0.00,1.00)

1: TOF-MS ES+

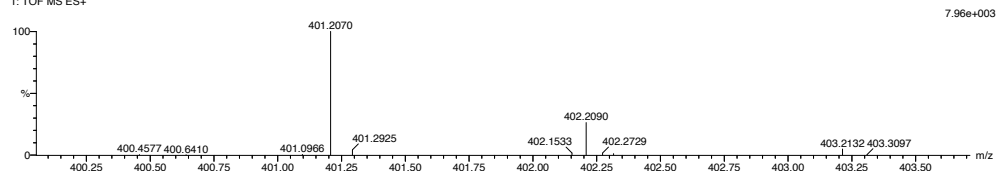

Minimum:

Maximum:

| Mass     | Calc. Mass | mDa  | PPM  | DBE  | i-FIT | i-FIT (Norm) | Formula          |
|----------|------------|------|------|------|-------|--------------|------------------|
| 401.2070 | 401.2090   | -2.0 | -5.0 | 14.5 | 55.4  | 0.1          | C23 H25 N6 O     |
|          | 401.2050   | 2.0  | 5.0  | 10.5 | 57.2  | 2.0          | C18 H25 N8 O3    |
|          | 401.2083   | -1.3 | -3.2 | 5.5  | 63.7  | 8.5          | C15 H29 N8 O3 S  |
|          | 401.2085   | -1.5 | -3.7 | 8.5  | 67.1  | 11.9         | C23 H33 N2 S2    |
|          | 401.2045   | 2.5  | 6.2  | 4.5  | 67.3  | 12.1         | C18 H33 N4 O2 S2 |
|          | 401.2079   | -0.9 | -2.2 | -0.5 | 69.1  | 13.9         | C15 H37 N4 O2 S3 |
|          | 401.2040   | 3.0  | 7.5  | -1.5 | 70.4  | 15.2         | C18 H41 O S4     |

6-(Benzyloxy)-8-methyl-9-(4-methylpiperazin-1-yl)-9*H*-purine (**28**).  $^1\text{H}$  NMR (500 MHz,  $\text{CDCl}_3$ )  $\delta$  8.41 (s, 1H), 7.51 (d,  $J = 7.0$  Hz, 2H), 7.37 – 7.31 (m, 2H), 7.31 – 7.26 (m, 1H), 5.62 (s, 2H), 4.29 – 4.13 (m, 2H), 3.09 – 2.75 (m, 6H), 2.55 (s, 3H), 2.36 (s, 3H).  $^{13}\text{C}$  NMR (126 MHz,  $\text{CDCl}_3$ )  $\delta$  159.67, 152.52, 152.28, 150.43, 136.44, 128.58, 128.49, 128.16, 119.11, 68.23, 55.25, 52.87, 45.95, 13.56. HRMS (ES + ve),  $\text{C}_{18}\text{H}_{23}\text{N}_6\text{O}$  ( $\text{M} + \text{H}$ ) $^+$ : Calculated 339.1933. Obtained 339.1955.

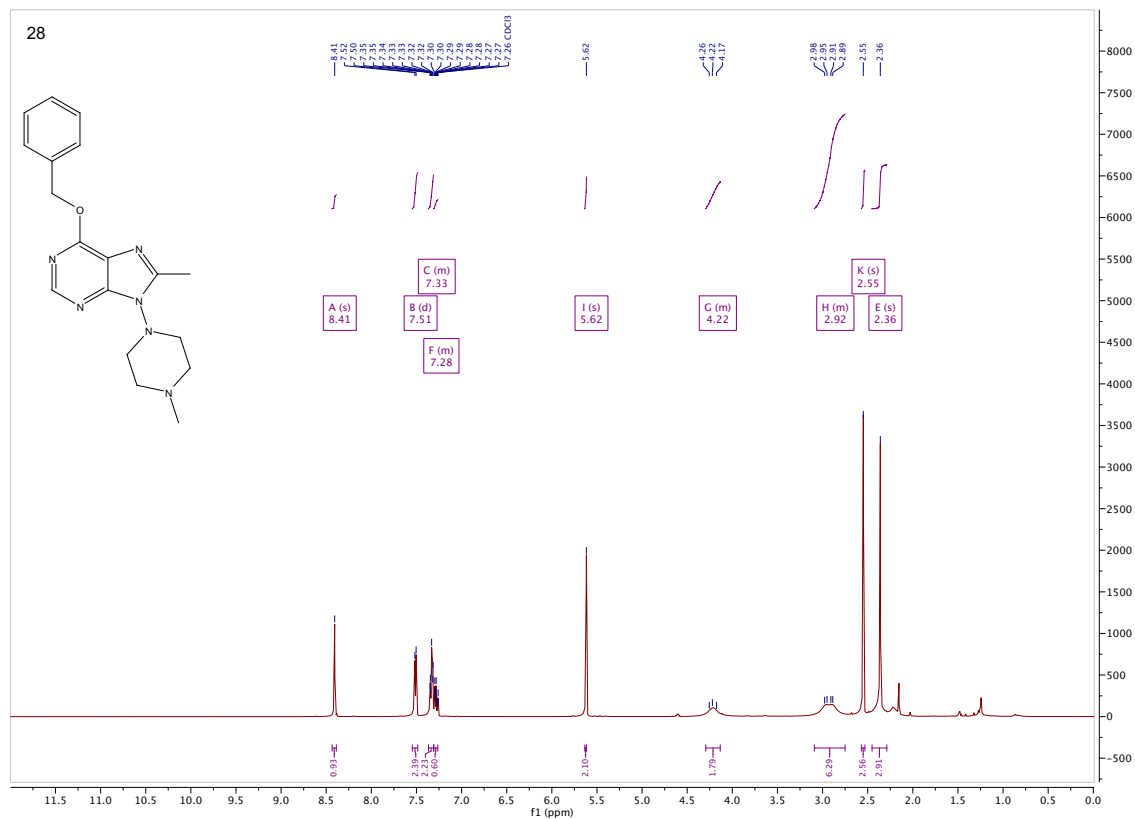

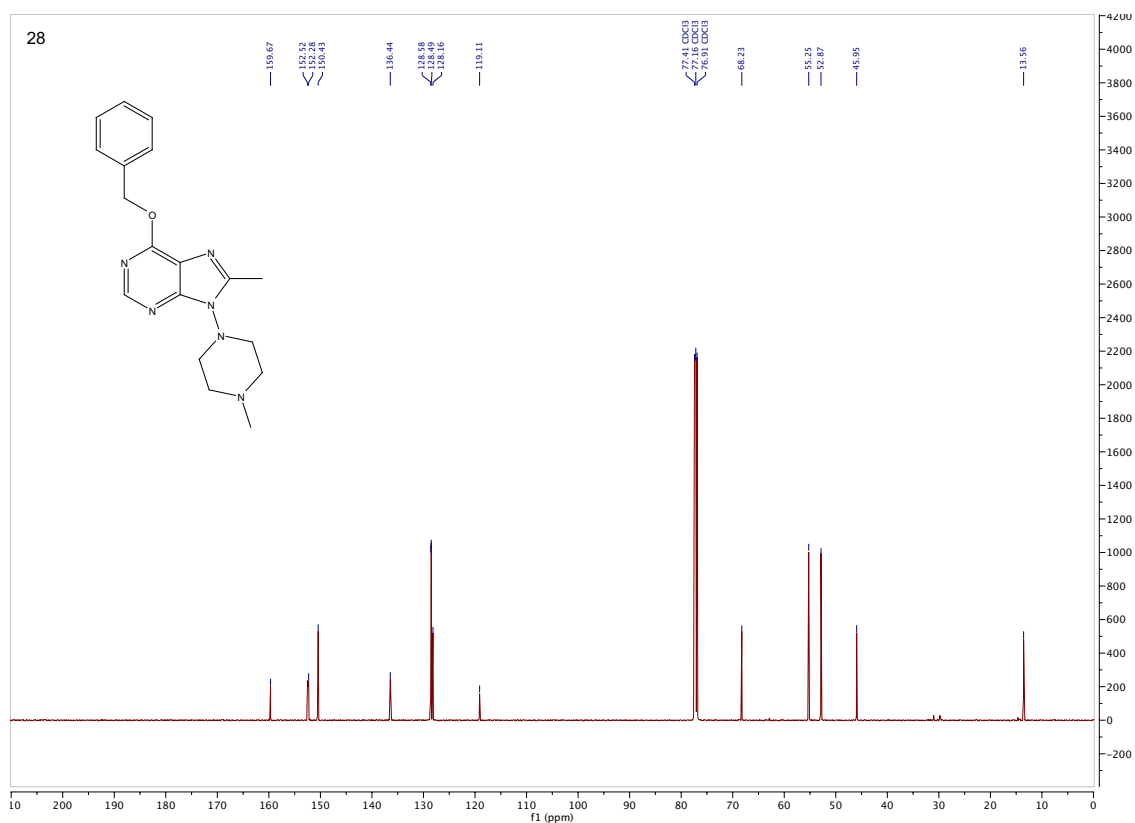

# Elemental Composition Report

Page 1

## Single Mass Analysis

Tolerance = 10.0 PPM / DBE: min = -1.5, max = 50.0

Element prediction: Off

Number of isotope peaks used for i-FIT = 3

Monoisotopic Mass, Even Electron Ions

103 formula(e) evaluated with 1 results within limits (up to 50 best isotopic matches for each mass)

Elements Used:

C: 0-18 H: 0-1000 N: 0-8 O: 0-4

ALM-28-1 142 (3.103) AM (Top,6, Ar,5000.0,0.00,1.00)

1: TOF MS ES+

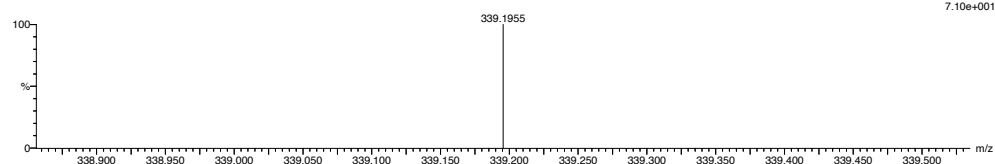

Minimum: -1.5  
Maximum: 5.0 10.0 50.0

| Mass     | Calc. Mass | mDa | PPM | DBE  | i-FIT | i-FIT (Norm) | Formula      |
|----------|------------|-----|-----|------|-------|--------------|--------------|
| 339.1955 | 339.1933   | 2.2 | 6.5 | 10.5 | 17.6  | 0.0          | C18 H23 N6 O |



6-(Benzyloxy)-9-(4-methylpiperazin-1-yl)-9*H*-purine (**29**).  $^1\text{H}$  NMR (500 MHz,  $\text{CDCl}_3$ )  $\delta$  8.51 (s, 1H), 8.03 (s, 1H), 7.56 – 7.50 (m, 2H), 7.40 – 7.27 (m, 3H), 5.66 (s, 2H), 3.57 – 3.53 (m, 4H), 2.69 – 2.65 (m, 4H), 2.37 (s, 3H).  $^{13}\text{C}$  NMR (126 MHz,  $\text{CDCl}_3$ )  $\delta$  160.85, 151.80, 151.24, 141.55, 136.28, 128.57, 128.48, 128.26, 120.58, 68.47, 54.97, 54.52, 45.87. HRMS (ES + ve),  $\text{C}_{17}\text{H}_{21}\text{N}_6\text{O}$  ( $\text{M} + \text{H}$ ) $^+$ : Calculated 325.177. Obtained 325.1750.

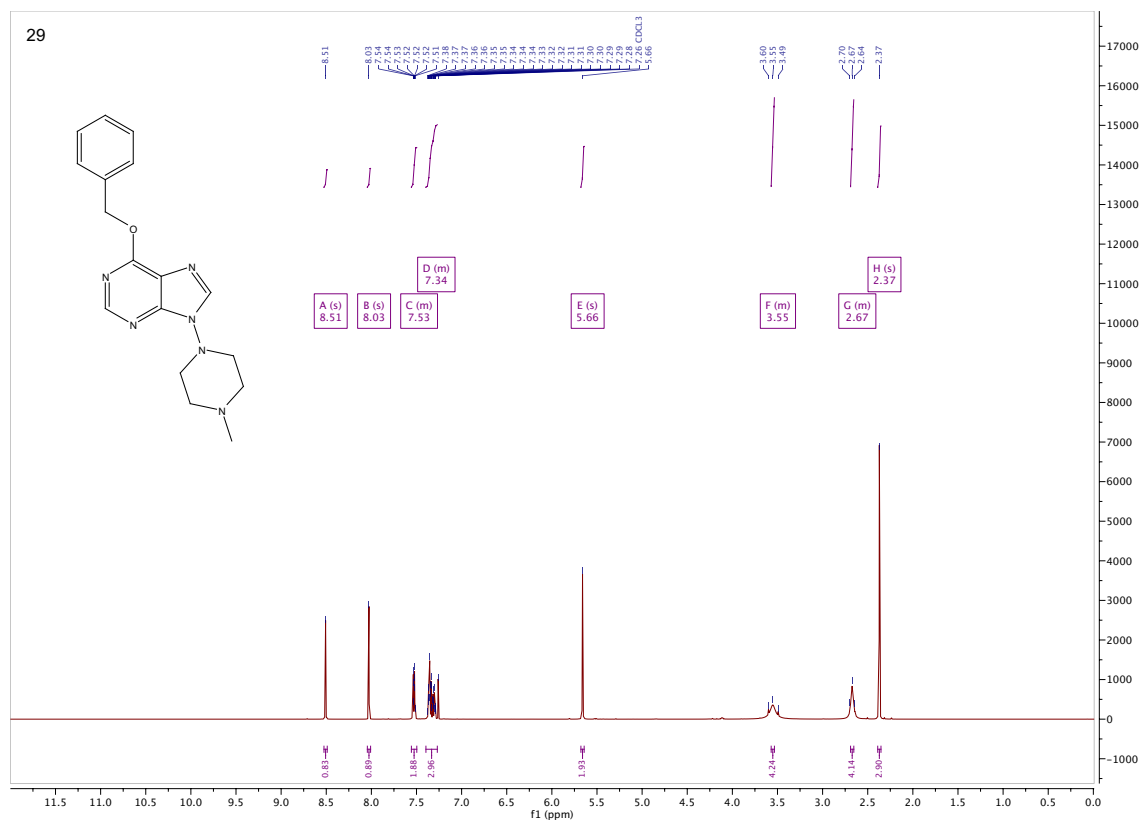

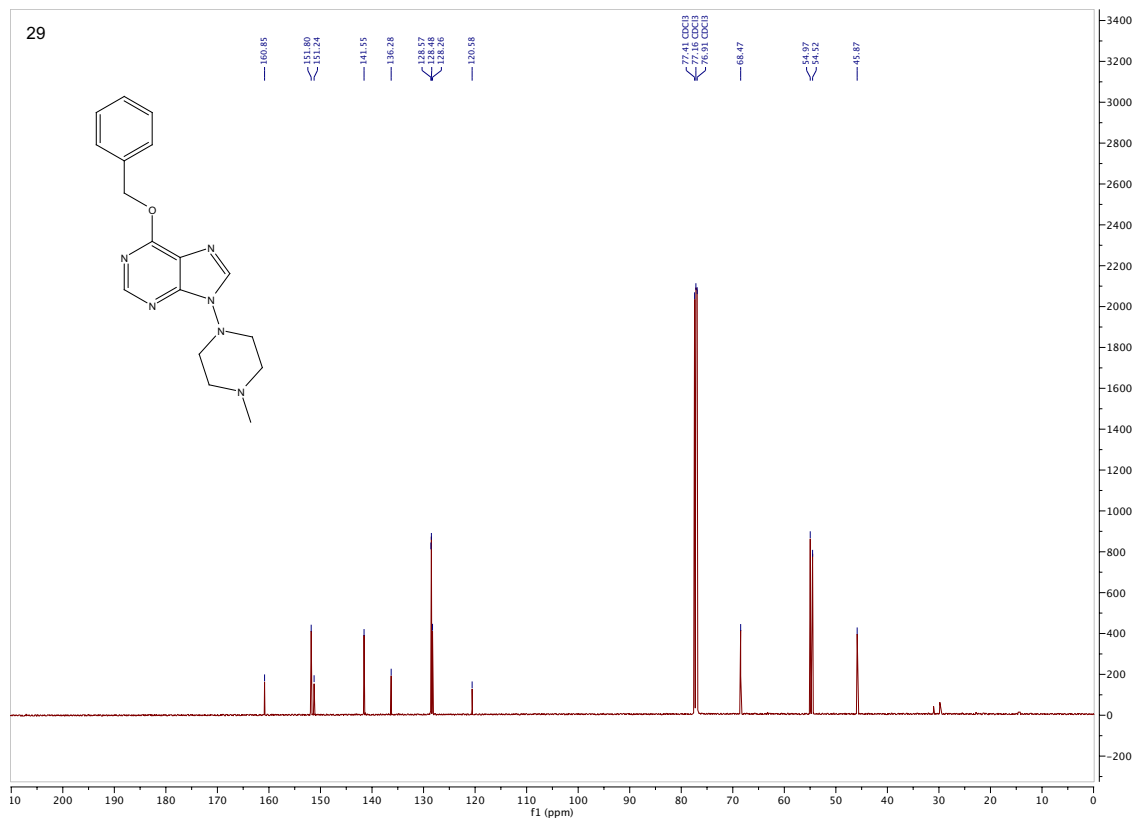

# Elemental Composition Report

Page 1

## Single Mass Analysis

Tolerance = 10.0 PPM / DBE: min = -1.5, max = 50.0

Element prediction: Off

Number of isotope peaks used for i-FIT = 3

Monoisotopic Mass, Even Electron Ions

116 formula(e) evaluated with 2 results within limits (up to 50 best isotopic matches for each mass)

Elements Used:

C: 0-18 H: 0-1000 N: 0-8 O: 0-4

ALM-29-1 11 (0.246) AM (Cen,6, 100.00, Ar,5000.0,0.00,1.00)

1: TOF-MS ES+

1.45e+004

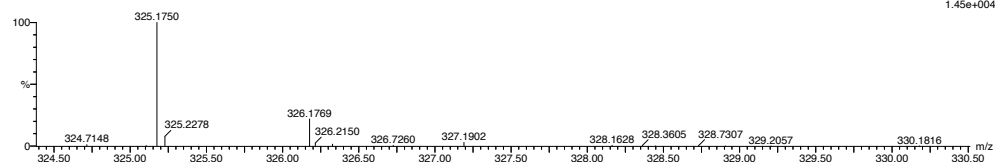

Minimum:

Maximum:

5.0

10.0

-1.5

50.0

| Mass     | Calc. Mass | mDa  | PPM  | DBE  | i-FIT | i-FIT (Norm) | Formula       |
|----------|------------|------|------|------|-------|--------------|---------------|
| 325.1750 | 325.1777   | -2.7 | -8.3 | 10.5 | 60.4  | 0.0          | C17 H21 N6 O  |
|          | 325.1737   | 1.3  | 4.0  | 6.5  | 66.7  | 6.3          | C12 H21 N8 O3 |

6-Ethoxy-9-isopropyl-9*H*-purine (**MJ-1**).  $^1\text{H}$  NMR (500 MHz, Chloroform-*d*)  $\delta$  8.48 (s, 1H), 7.94 (s, 1H), 4.90 – 4.81 (m, 1H), 4.67 – 4.59 (m, 2H), 1.62 – 1.57 (m, 6H), 1.51 – 1.44 (m, 3H).  $^{13}\text{C}$  NMR (126 MHz, Chloroform-*d*)  $\delta$  160.93, 151.83, 139.66, 121.95, 63.09, 47.45, 22.71, 14.62. HRMS (ES + ve),  $\text{C}_{10}\text{H}_{15}\text{N}_4\text{O}$  ( $\text{M} + \text{H}$ ) $^+$ : Calculated 207.1246. Obtained 207.1245.

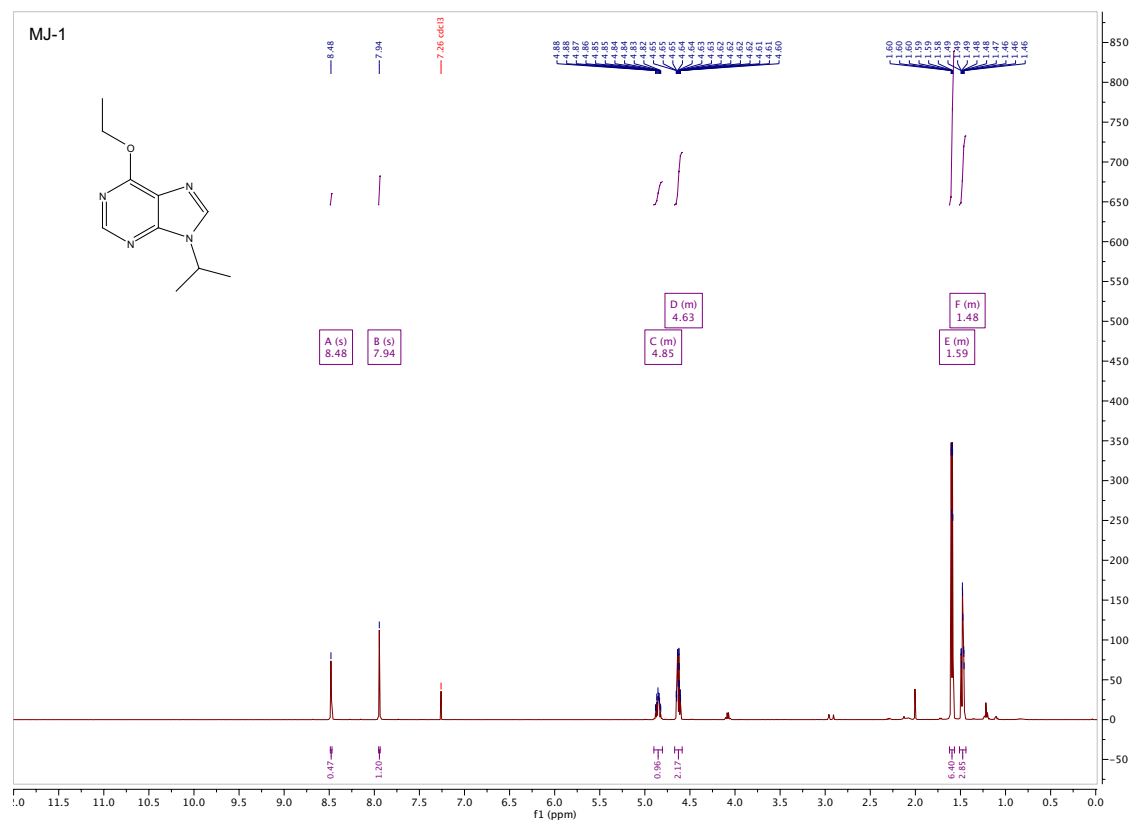

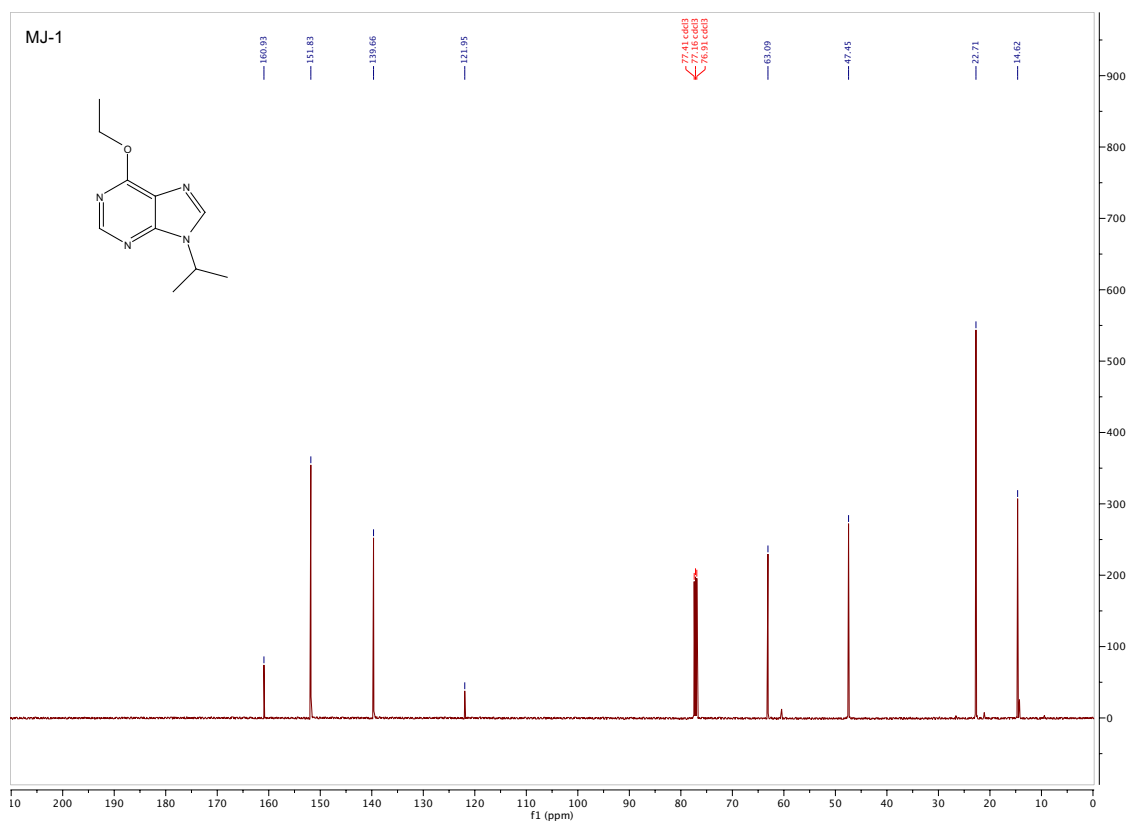

## Elemental Composition Report

Page 1

### Single Mass Analysis

Tolerance = 5.0 PPM / DBE: min = -1.5, max = 50.0

Element prediction: Off

Number of isotope peaks used for i-FIT = 3

Monoisotopic Mass, Even Electron Ions

369 formula(e) evaluated with 1 results within limits (up to 50 best isotopic matches for each mass)

Elements Used:

C: 0-22 H: 0-1000 N: 0-5 O: 0-6 F: 0-3

ASIMJ-1 40 (0.885)

12/3289

1: TOF MS ES+  
1.90e+002

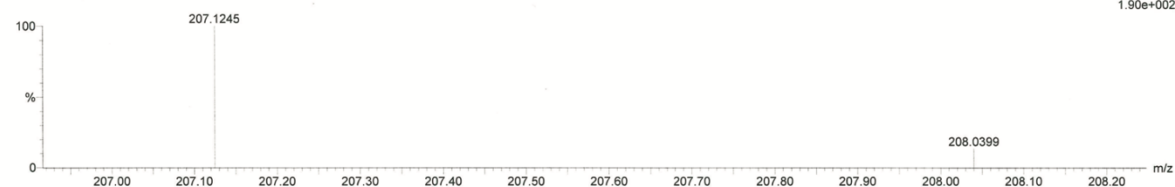

|          |            |      |      |      |       |              |
|----------|------------|------|------|------|-------|--------------|
| Minimum: |            |      |      |      |       |              |
| Maximum: | 20.0       | 5.0  | -1.5 | 50.0 |       |              |
| Mass     | Calc. Mass | mDa  | PPM  | DBE  | i-FIT | Formula      |
| 207.1245 | 207.1246   | -0.1 | -0.5 | 5.5  | n/a   | C10 H15 N4 O |

6-(Benzyloxy)-9-isopropyl-8-methyl-9*H*-purine (**MJ-5**).  $^1\text{H}$  NMR (500 MHz,  $\text{CDCl}_3$ )  $\delta$  8.46 (s, 1H), 7.57 – 7.48 (m, 2H), 7.39 – 7.30 (m, 2H), 7.33 – 7.26 (m, 1H), 5.64 (s, 2H), 4.80 – 4.68 (m, 1H), 2.63 (s, 3H), 1.68 (d,  $J = 6.8$  Hz, 6H).  $^{13}\text{C}$  NMR (126 MHz,  $\text{CDCl}_3$ )  $\delta$  159.58, 153.54, 150.86, 150.57, 136.59, 128.60, 128.52, 128.15, 120.90, 68.23, 48.52, 21.40, 15.33. HRMS (ES + ve),  $\text{C}_{16}\text{H}_{19}\text{N}_4\text{O}$  ( $\text{M} + \text{H}$ ) $^+$ : Calculated 283.1559. Obtained 283.1558.

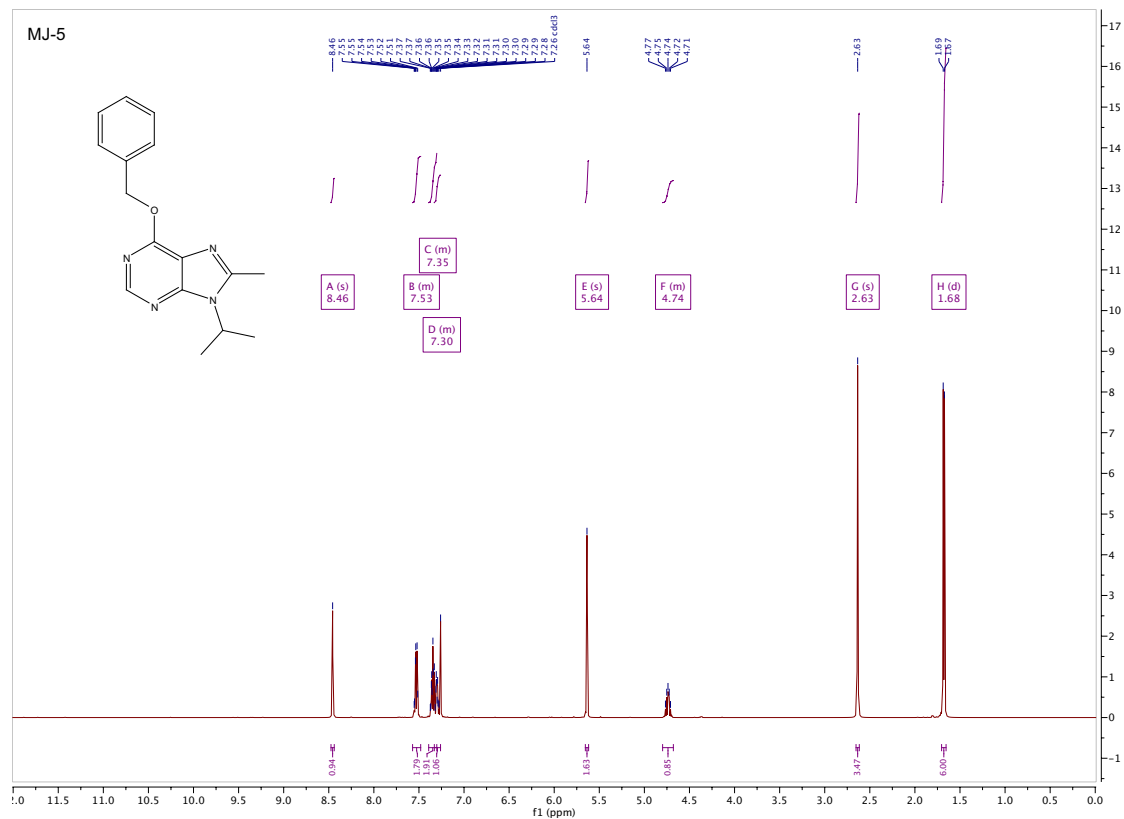

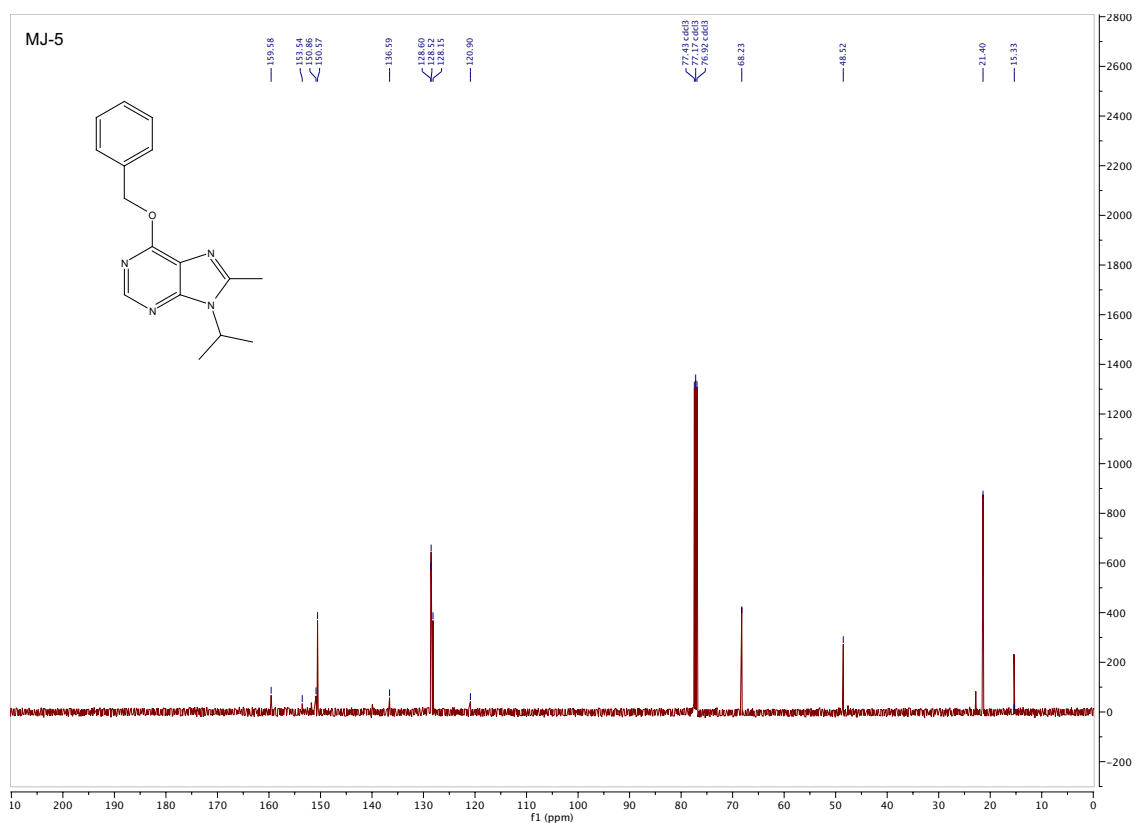

# Elemental Composition Report

Page 1

## Single Mass Analysis

Tolerance = 5.0 PPM / DBE: min = -1.5, max = 50.0

Element prediction: Off

Number of isotope peaks used for i-FIT = 3

Monoisotopic Mass, Even Electron Ions

525 formula(e) evaluated with 4 results within limits (up to 50 best isotopic matches for each mass)

Elements Used:

C: 0-22 H: 0-1000 N: 0-5 O: 0-6 F: 0-3

12/3293

ASIMJ-5 9 (0.217)

1: TOF MS ES+  
9.28e+001

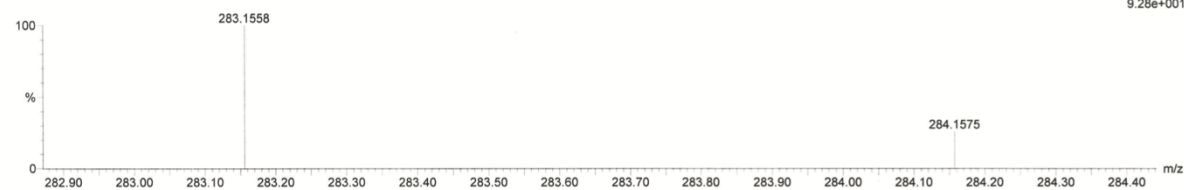

| Minimum: |            |      |      | -1.5 |       |                 |
|----------|------------|------|------|------|-------|-----------------|
| Maximum: | 20.0       | 5.0  |      | 50.0 |       |                 |
| Mass     | Calc. Mass | mDa  | PPM  | DBE  | i-FIT | Formula         |
| 283.1558 | 283.1559   | -0.1 | -0.4 | 9.5  | n/a   | C16 H19 N4 O    |
|          | 283.1570   | -1.2 | -4.2 | 5.5  | n/a   | C13 H20 N4 O2 F |
|          | 283.1545   | 1.3  | 4.6  | 4.5  | n/a   | C15 H23 O5      |
|          | 283.1557   | 0.1  | 0.4  | 0.5  | n/a   | C12 H24 O6 F    |

9-Benzyl-6-ethoxy-9*H*-purine (**MJ-7**).  $^1\text{H}$  NMR (500 MHz,  $\text{CDCl}_3$ )  $\delta$  8.51 (s, 1H), 7.84 (s, 1H), 7.33 – 7.26 (m, 3H), 7.24 (dd,  $J = 8.0, 2.3$  Hz, 2H), 5.37 (s, 2H), 4.63 (q,  $J = 7.1$  Hz, 2H), 1.47 (t,  $J = 7.1$  Hz, 3H).  $^{13}\text{C}$  NMR (126 MHz,  $\text{CDCl}_3$ )  $\delta$  161.07, 152.47, 152.33, 141.95, 135.48, 129.22, 128.62, 127.88, 121.53, 63.29, 47.56, 14.67. HRMS (ES + ve),  $\text{C}_{14}\text{H}_{15}\text{N}_4\text{O}$  ( $\text{M} + \text{H}$ ) $^+$ : Calculated 255.1246. Obtained 255.1252.

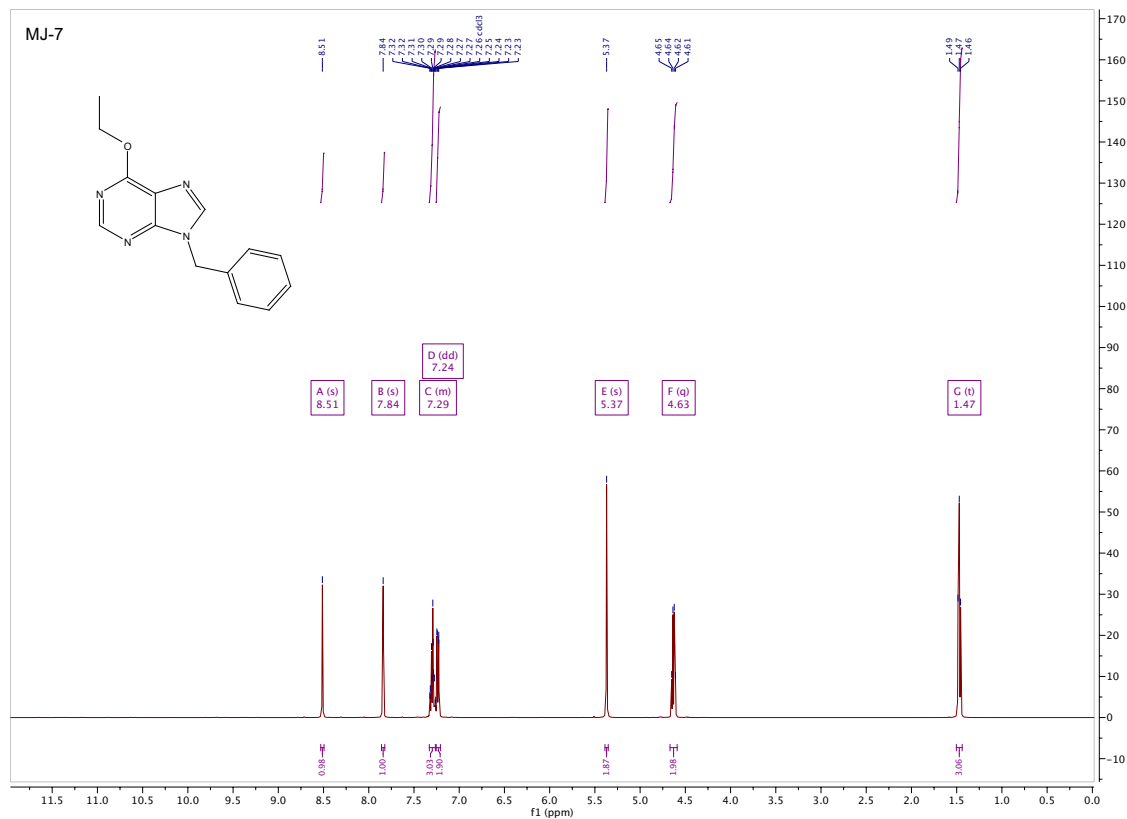

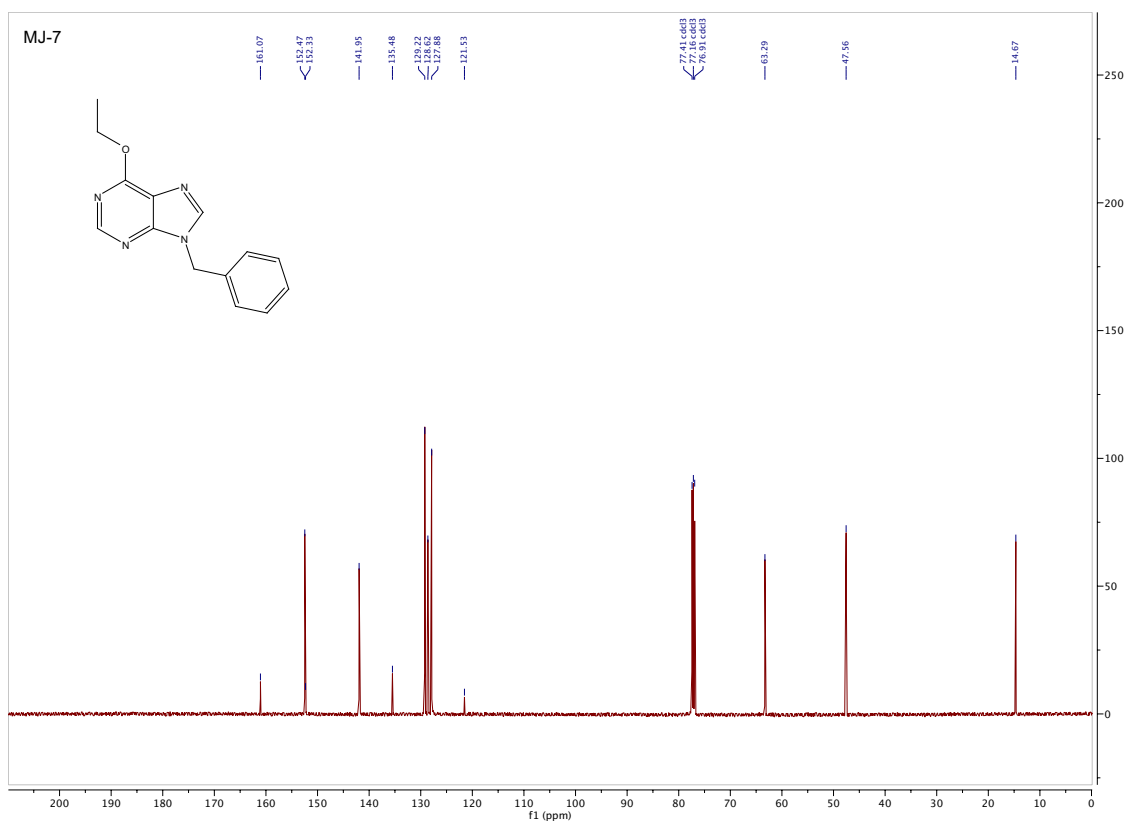

# 5f. - 9-Benzyl-6-ethoxy-9H-purine (MS)

## Elemental Composition Report

Page 1

### Single Mass Analysis

Tolerance = 5.0 PPM / DBE: min = -1.5, max = 50.0

Element prediction: Off

Number of isotope peaks used for i-FIT = 3

Monoisotopic Mass, Even Electron Ions

1456 formula(e) evaluated with 4 results within limits (up to 50 best isotopic matches for each mass)

Elements Used:

C: 0-16 H: 0-1000 N: 0-5 O: 0-6 Na: 0-1 S: 0-1 Cl: 0-4

120.08 7

1: TOF MS ES+  
8.63e+001

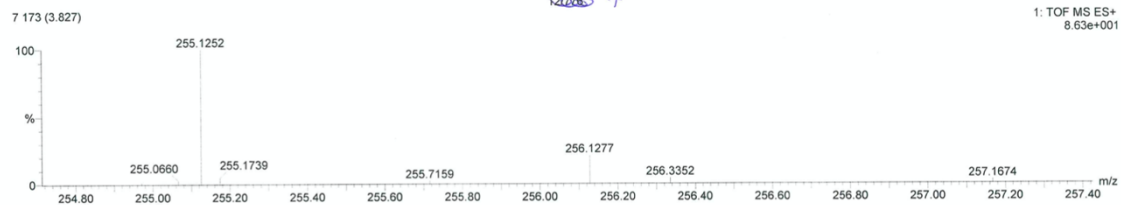

|          |            |      |      |     |       |                    |
|----------|------------|------|------|-----|-------|--------------------|
| Minimum: |            |      |      |     |       |                    |
| Maximum: |            |      |      |     |       |                    |
| Mass     | Calc. Mass | mDa  | PPM  | DBE | i-FIT | Formula            |
| 255.1252 | 255.1246   | 0.6  | 2.4  | 9.5 | n/a   | C14 H15 N4 O       |
|          | 255.1256   | -0.4 | -1.6 | 1.5 | n/a   | C9 H20 N4 O Na S   |
|          | 255.1264   | -1.2 | -4.7 | 4.5 | n/a   | C13 H20 N2 O Cl    |
|          | 255.1240   | 1.2  | 4.7  | 1.5 | n/a   | C11 H21 N2 O Na Cl |



9-Benzyl-6-ethoxy-8-methyl-9*H*-purine (**MJ-8**).  $^1\text{H}$  NMR (500 MHz,  $\text{CDCl}_3$ )  $\delta$  8.50 (s, 1H), 7.35 – 7.26 (m, 2H), 7.17 – 7.10 (m, 2H), 5.40 (s, 2H), 4.65 (q,  $J = 7.1$  Hz, 2H), 2.51 (s, 3H), 1.51 (t,  $J = 7.1$  Hz, 3H).  $^{13}\text{C}$  NMR (126 MHz,  $\text{CDCl}_3$ )  $\delta$  159.98, 153.69, 151.66, 151.57, 135.65, 129.13, 128.25, 127.07, 120.49, 63.10, 46.23, 14.73, 14.54. HRMS (ES + ve),  $\text{C}_{15}\text{H}_{17}\text{N}_4\text{O}$  ( $\text{M} + \text{H}^+$ ): Calculated 269.1402. Obtained 269.1396.

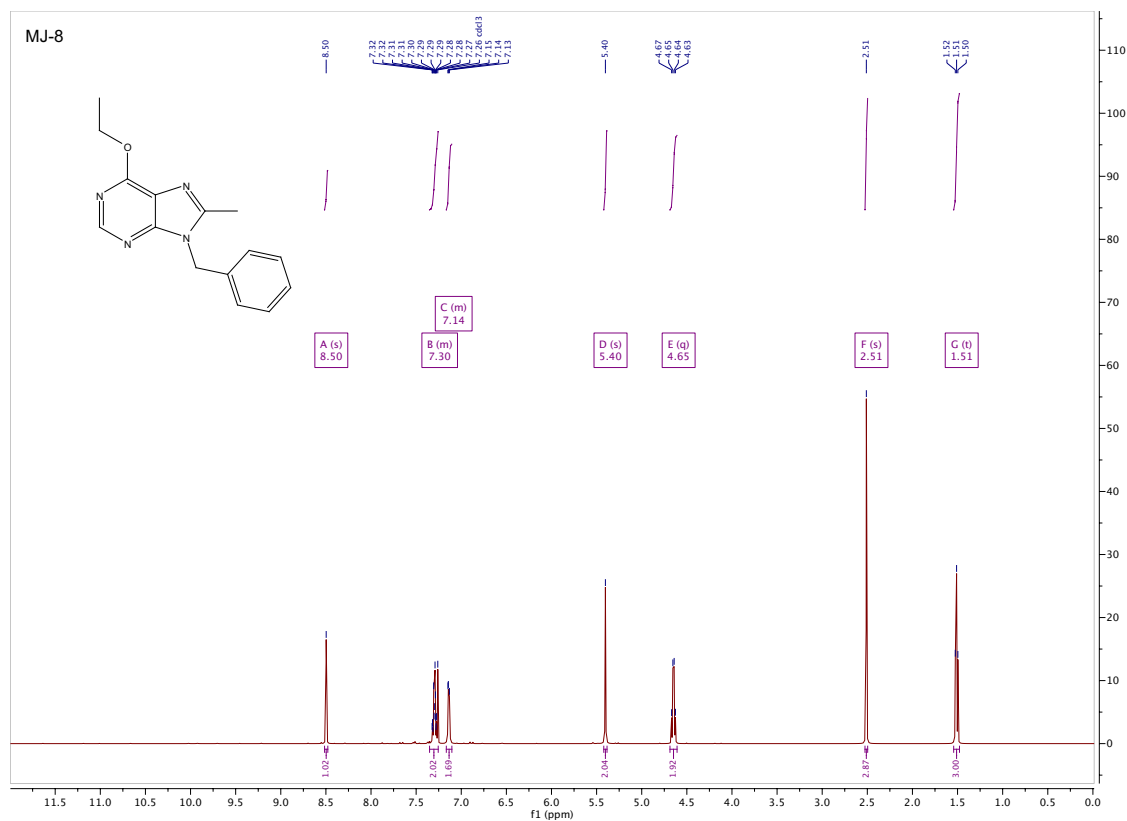

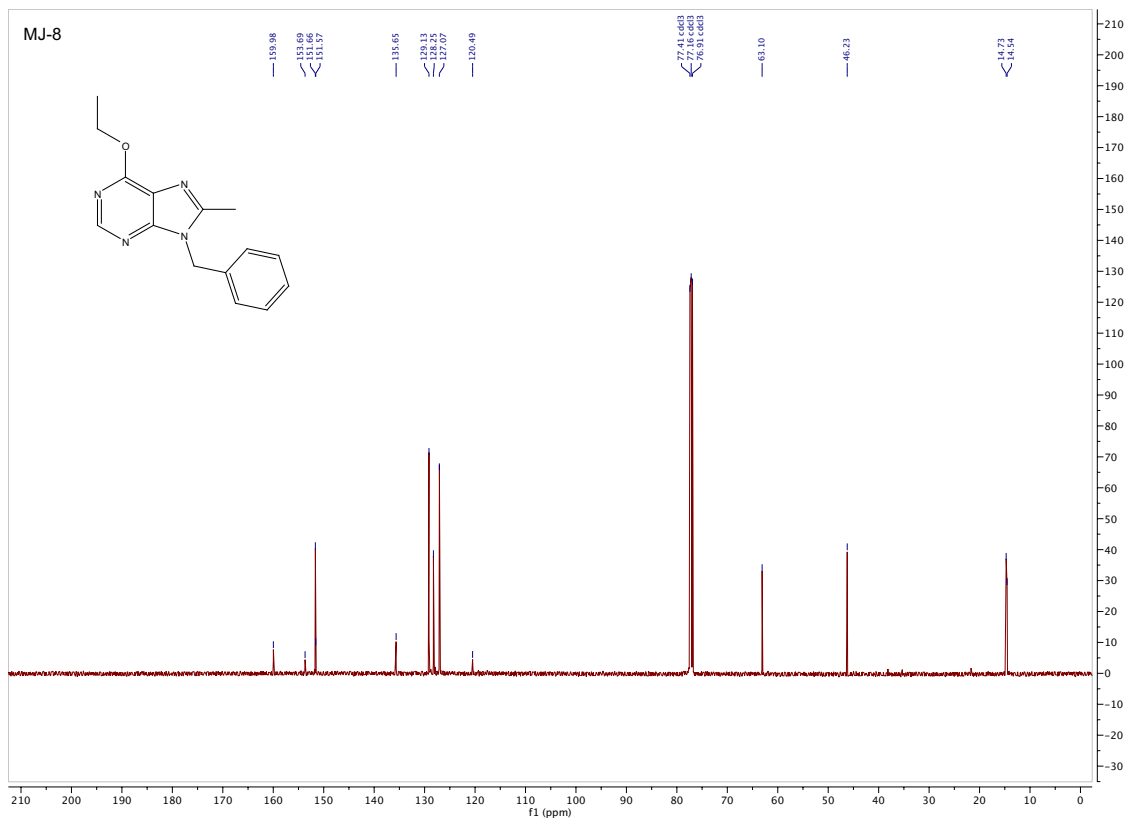

# 5g.- 9-Benzyl-6-ethoxy-8-methyl-9H-purine (MS)

## Elemental Composition Report

Page 1

### Single Mass Analysis

Tolerance = 5.0 PPM / DBE: min = -1.5, max = 50.0

Element prediction: Off

Number of isotope peaks used for i-FIT = 3

Monoisotopic Mass, Even Electron Ions

1585 formula(e) evaluated with 3 results within limits (up to 50 best isotopic matches for each mass)

Elements Used:

C: 0-16 H: 0-1000 N: 0-5 O: 0-6 Na: 0-1 S: 0-1 Cl: 0-4

8 9 (0.212)

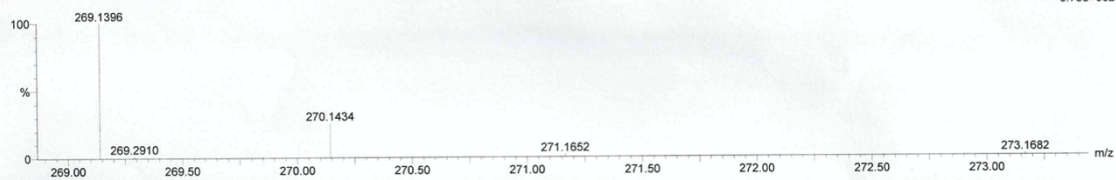

|          |            |      |      |     |       |                    |
|----------|------------|------|------|-----|-------|--------------------|
| Minimum: |            |      |      |     |       |                    |
| Maximum: |            |      |      |     |       |                    |
| Mass     | Calc. Mass | mDa  | PPM  | DBE | i-FIT | Formula            |
| 269.1396 | 269.1402   | -0.6 | -2.2 | 9.5 | 6.0   | C15 H17 N4 O       |
|          | 269.1389   | 0.7  | 2.6  | 4.5 | 11.4  | C14 H21 O5         |
|          | 269.1397   | -0.1 | -0.4 | 1.5 | n/a   | C12 H23 N2 O Na Cl |

DM-013

AKI

9-Benzyl-6-(benzyloxy)-9*H*-purine (**MJ-11**). <sup>1</sup>H NMR (500 MHz, CDCl<sub>3</sub>) δ 8.58 (s, 1H), 7.89 (s, 1H), 7.58 – 7.51 (m, 2H), 7.40 – 7.25 (m, 8H), 5.69 (s, 2H), 5.41 (s, 2H). <sup>13</sup>C NMR (126 MHz, CDCl<sub>3</sub>) δ 160.77, 152.36, 142.17, 136.33, 135.44, 129.25, 128.66, 128.57, 128.50, 128.25, 127.92, 127.11, 121.59, 68.58, 47.62. HRMS (ES + ve), C<sub>19</sub>H<sub>17</sub>N<sub>4</sub>O (M + H)<sup>+</sup>: Calculated 317.1402. Obtained 317.1407.

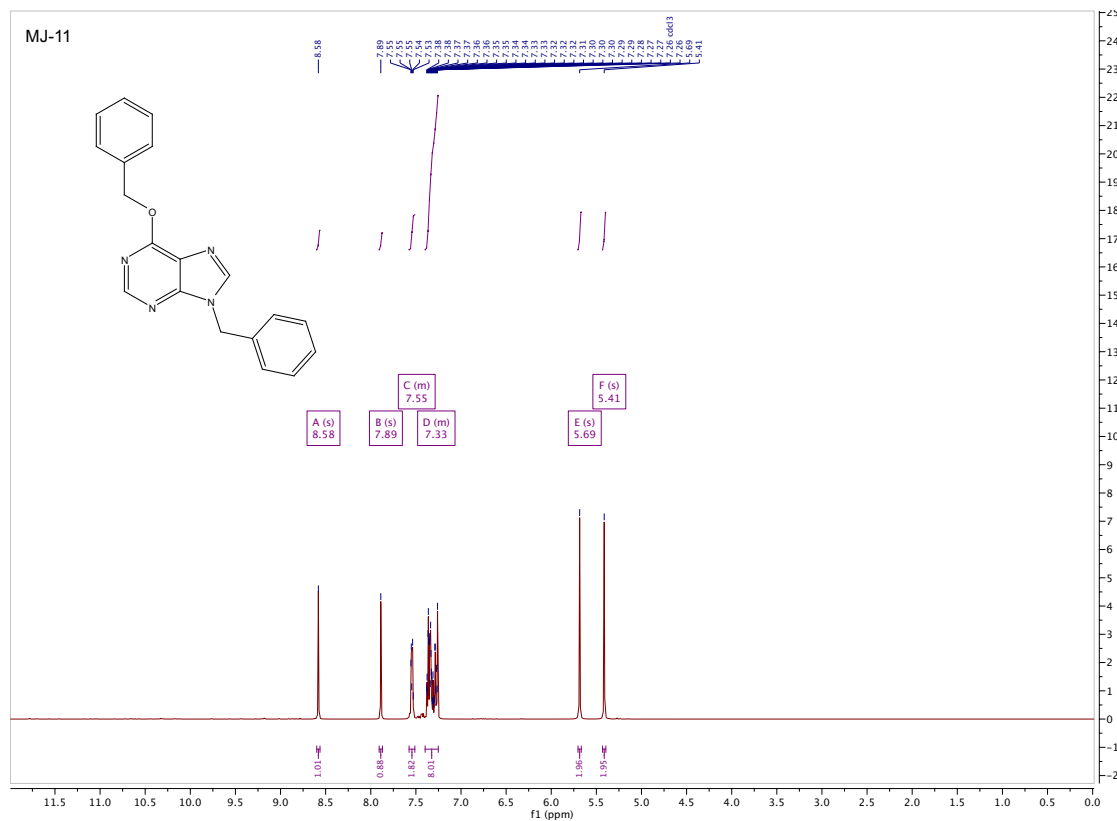

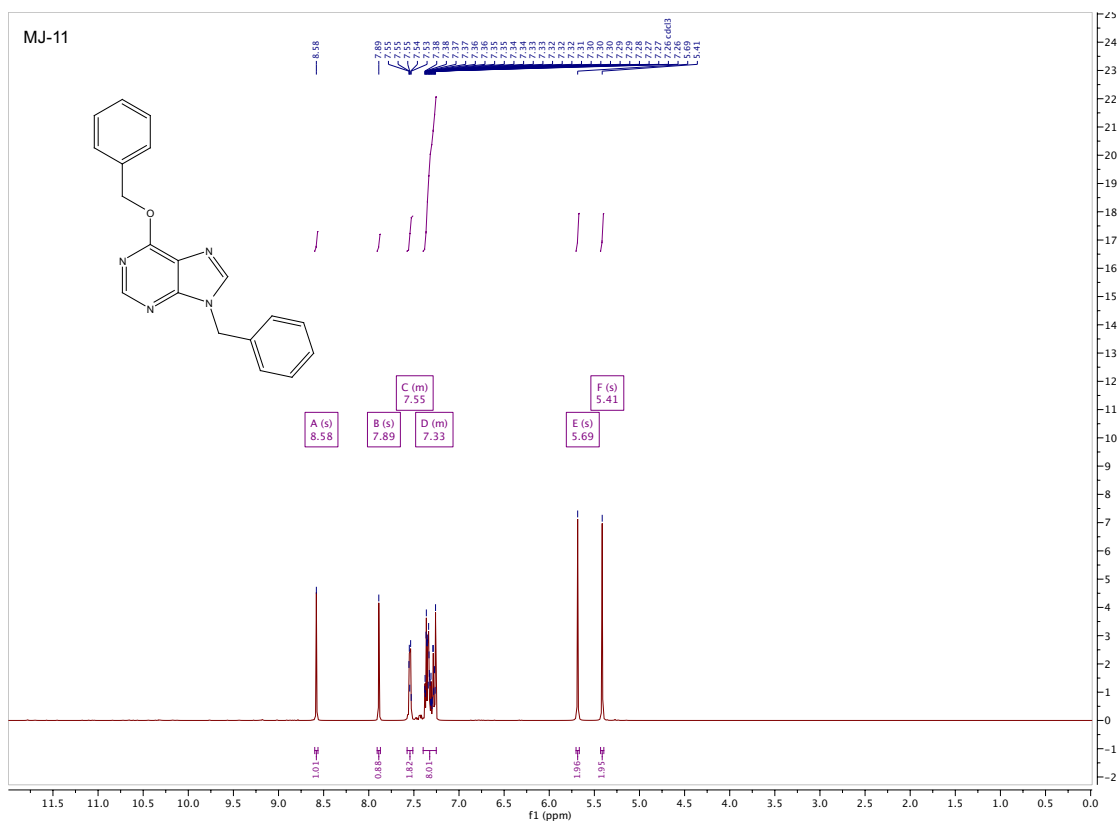

# 5i- 9-Benzyl-6-(benzyloxy)-9H-purine (MS)

## Elemental Composition Report

Page 1

### Single Mass Analysis

Tolerance = 5.0 PPM / DBE: min = -1.5, max = 50.0

Element prediction: Off

Number of isotope peaks used for i-FIT = 3

Monoisotopic Mass, Even Electron Ions

573 formula(e) evaluated with 3 results within limits (up to 50 best isotopic matches for each mass)

Elements Used:

C: 0-22 H: 0-1000 N: 0-5 O: 0-6 F: 0-3

ASIMJ-11 9 (0.217)

1: TOF MS ES+

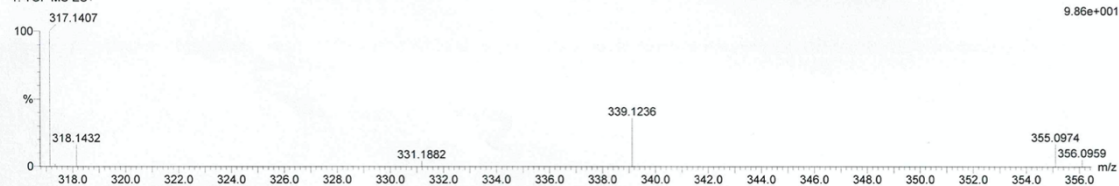

|          |            |      |      |      |       |                 |
|----------|------------|------|------|------|-------|-----------------|
| Minimum: |            |      |      | -1.5 |       |                 |
| Maximum: |            | 20.0 | 5.0  | 50.0 |       |                 |
| Mass     | Calc. Mass | mDa  | PPM  | DBE  | i-FIT | Formula         |
| 317.1407 | 317.1414   | -0.7 | -2.2 | 9.5  | n/a   | C16 H18 N4 O2 F |
|          | 317.1400   | 0.7  | 2.2  | 4.5  | n/a   | C15 H22 O6 F    |
|          | 317.1402   | 0.5  | 1.6  | 13.5 | n/a   | C19 H17 N4 O    |

6-Isopropoxy-9-isopropyl-9*H*-purine (**MJ-16**).  $^1\text{H}$  NMR (300 MHz,  $\text{CDCl}_3$ )  $\delta$  8.51 (s, 1H), 7.95 (s, 1H), 5.67 (p,  $J = 6.4$  Hz, 1H), 4.88 (p,  $J = 6.8$  Hz, 1H), 1.62 (d,  $J = 6.8$  Hz, 9H), 1.47 (d,  $J = 6.1$  Hz, 10H).  $^{13}\text{C}$  NMR (75 MHz,  $\text{CDCl}_3$ )  $\delta$  160.76, 151.95, 150.17, 139.52, 122.18, 70.34, 47.47, 22.81, 22.16. HRMS (ES + ve),  $\text{C}_{11}\text{H}_{17}\text{N}_4\text{O}$  ( $\text{M} + \text{H}$ ) $^+$ : Calculated 221.1402. Obtained 221.1402.

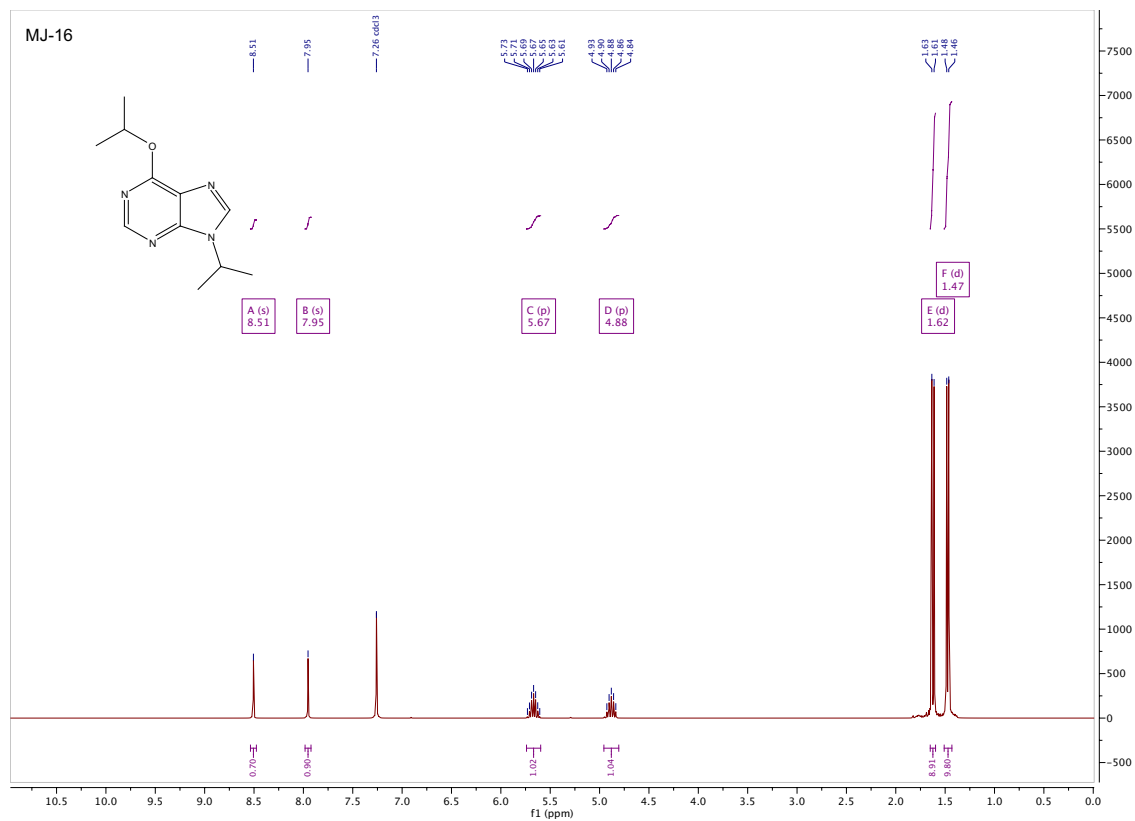

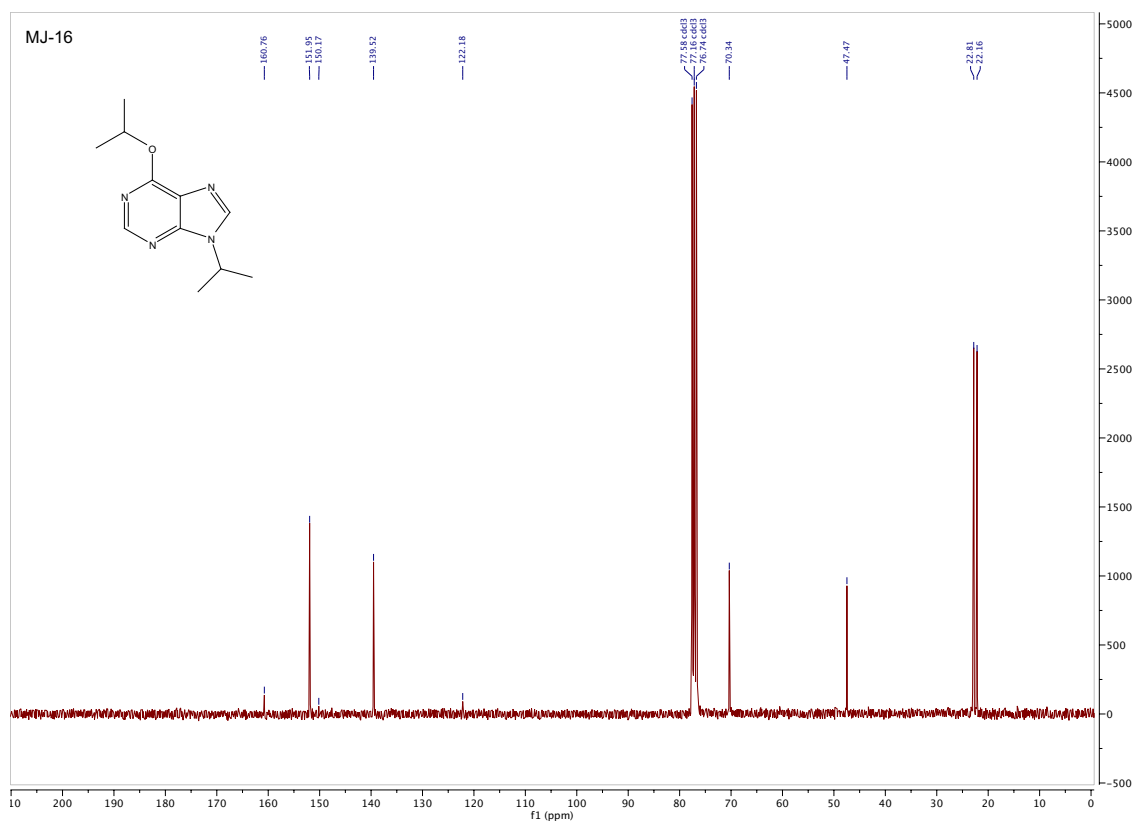

# 5j. - 6-Isopropoxy-9-isopropyl-9H-purine (MS)

## Elemental Composition Report

Page 1

### Single Mass Analysis

Tolerance = 5.0 PPM / DBE: min = -1.5, max = 50.0

Element prediction: Off

Number of isotope peaks used for i-FIT = 3

Monoisotopic Mass, Even Electron Ions

422 formula(e) evaluated with 1 results within limits (up to 50 closest results for each mass)

Elements Used:

C: 0-15 H: 0-1000 N: 0-10 O: 0-10 Na: 0-1

12/7270

1: TOF MS ES+  
3.64e+002

ASIMJ-16 69 (1.534)

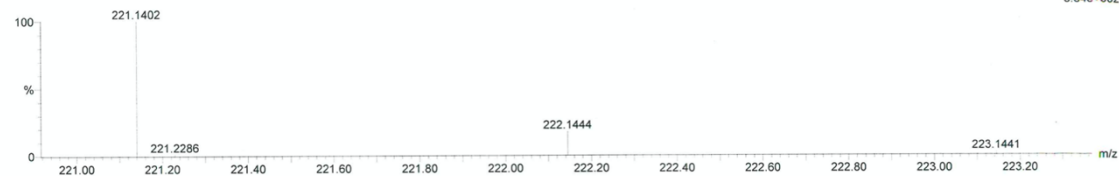

| Minimum: |            |      |     | -1.5 |       |              |
|----------|------------|------|-----|------|-------|--------------|
| Maximum: |            | 20.0 | 5.0 | 50.0 |       |              |
| Mass     | Calc. Mass | mDa  | PPM | DBE  | i-FIT | Formula      |
| 221.1402 | 221.1402   | 0.0  | 0.0 | 5.5  | 2.0   | C11 H17 N4 O |

6-Isopropoxy-9-isopropyl-8-methyl-9*H*-purine (**MJ-17**). <sup>1</sup>H NMR (300 MHz, CDCl<sub>3</sub>) δ 8.50 (s, 1H), 5.65 (ddt, *J* = 12.5, 11.0, 6.2 Hz, 1H), 4.88 (p, *J* = 6.8 Hz, 1H), 2.64 (s, 3H), 1.62 (d, *J* = 6.8 Hz, 6H), 1.47 (d, *J* = 6.2 Hz, 6H). HRMS (ES + ve), C<sub>12</sub>H<sub>19</sub>N<sub>4</sub>O (M + H)<sup>+</sup>: Calculated 235.1559. Obtained 235.1553.

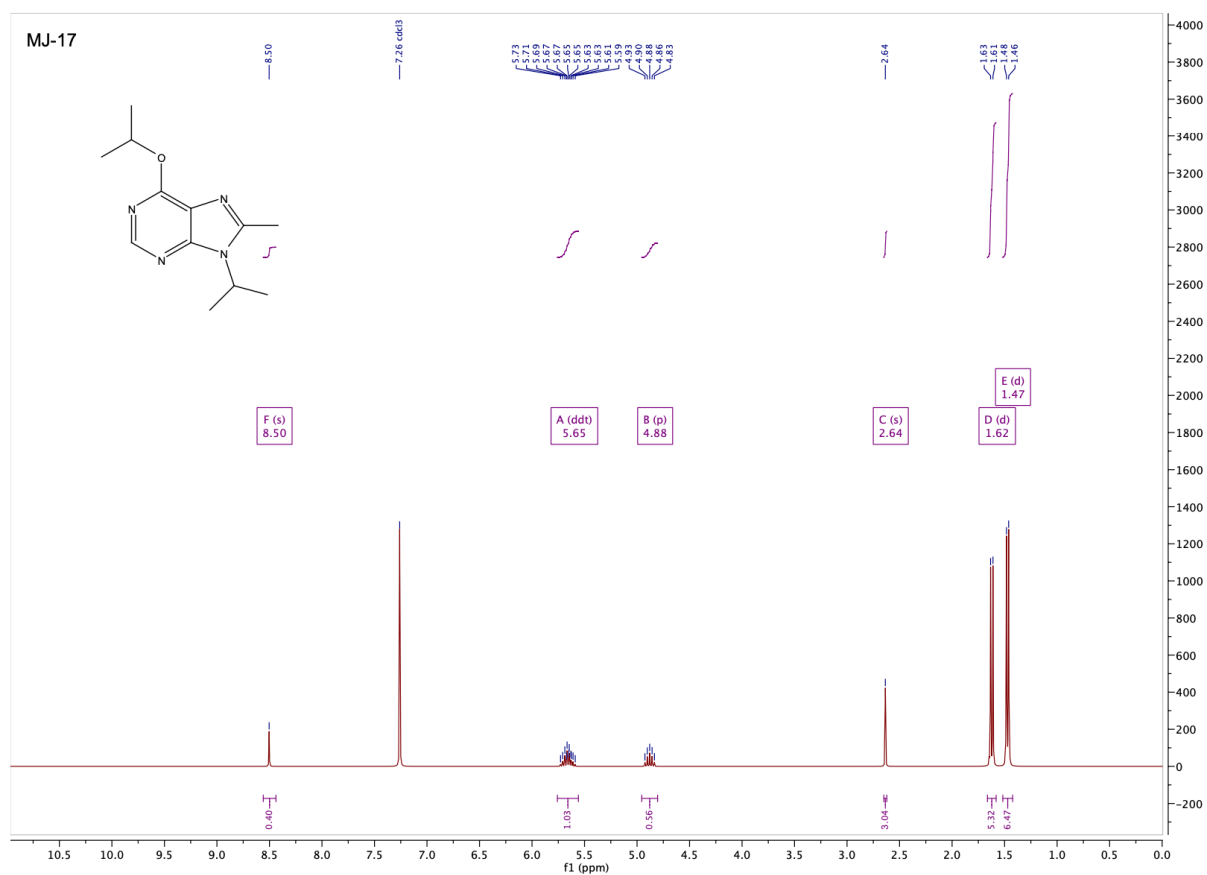

# Elemental Composition Report

Page 1

## Single Mass Analysis

Tolerance = 5.0 PPM / DBE: min = -1.5, max = 50.0

Element prediction: Off

Number of isotope peaks used for i-FIT = 3

Monoisotopic Mass, Even Electron Ions

463 formula(e) evaluated with 2 results within limits (up to 50 closest results for each mass)

Elements Used:

C: 0-15 H: 0-1000 N: 0-10 O: 0-10 Na: 0-1

ASIMJ-17conc 243 (5.361)

1: TOF MS ES+

3.70e+002

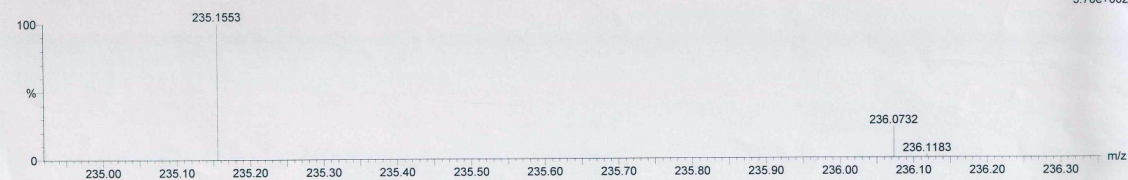

| Minimum: |            |      |      | -1.5 |       |              |
|----------|------------|------|------|------|-------|--------------|
| Maximum: |            | 20.0 | 5.0  | 50.0 |       |              |
| Mass     | Calc. Mass | mDa  | PPM  | DBE  | i-FIT | Formula      |
| 235.1553 | 235.1559   | -0.6 | -2.6 | 5.5  | n/a   | C12 H19 N4 O |
|          | 235.1545   | 0.8  | 3.4  | 0.5  | n/a   | C11 H23 O5   |



9-*tert*-Butyl-6-ethoxy-9*H*-purine (**MJ-24**).  $^1\text{H}$  NMR (300 MHz,  $\text{CDCl}_3$ )  $\delta$  8.50 (s, 0H), 7.98 (s, 1H), 4.65 (q,  $J = 7.0$  Hz, 2H), 1.81 (s, 9H), 1.51 (t,  $J = 7.1$  Hz, 3H).  $^{13}\text{C}$  NMR (75 MHz,  $\text{CDCl}_3$ )  $\delta$  161.12, 151.10, 149.92, 139.78, 136.06, 123.07, 63.01, 57.70, 29.21, 14.70. HRMS (ES + ve),  $\text{C}_{11}\text{H}_{17}\text{N}_4\text{O}$  ( $\text{M} + \text{H}$ ) $^+$ : Calculated 321.1402. Obtained 321.1400.

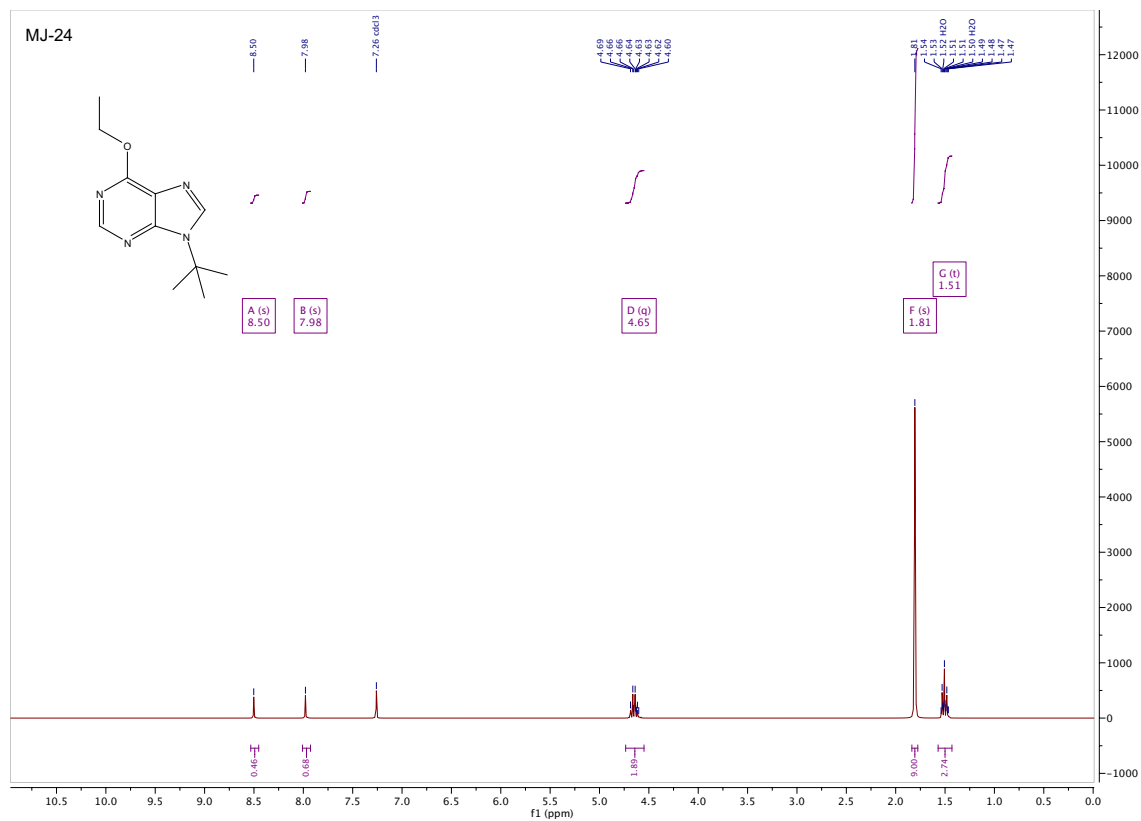

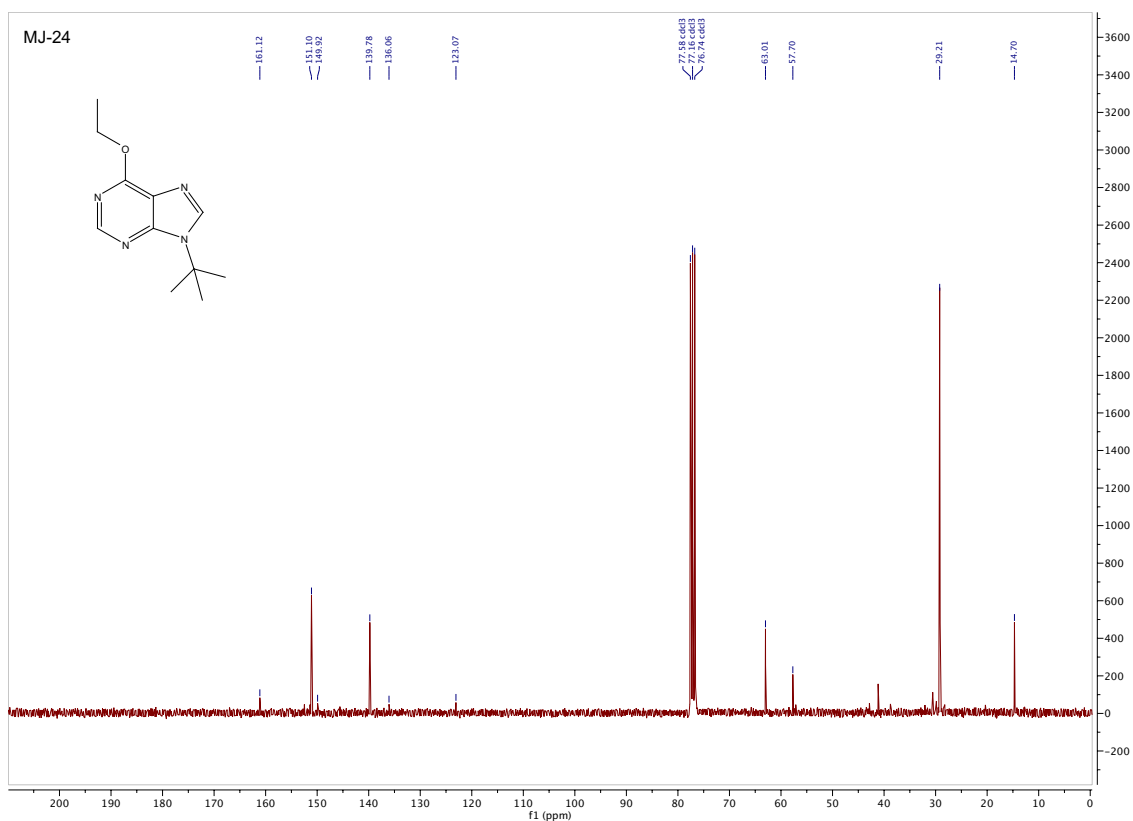

# 5n. - 9-tert-butyl-6-ethoxy-9H-purine (MS)

## Elemental Composition Report

Page 1

### Single Mass Analysis

Tolerance = 5.0 PPM / DBE: min = -1.5, max = 50.0

Element prediction: Off

Number of isotope peaks used for i-FIT = 3

Monoisotopic Mass, Even Electron Ions

362 formula(e) evaluated with 2 results within limits (up to 50 best isotopic matches for each mass)

Elements Used:

C: 0-56 H: 0-1000 N: 0-4 O: 0-10 Na: 0-1 Br: 0-1

1: TOF MS ES+

ASIMJ-24 8 (0.175)

2.36e+003

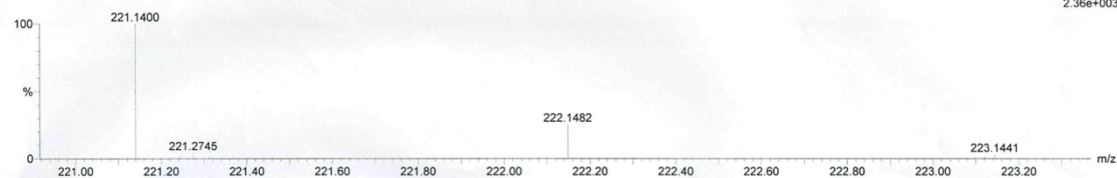

|          |            |      |      |      |       |         |          |
|----------|------------|------|------|------|-------|---------|----------|
| Minimum: |            |      |      | -1.5 |       |         |          |
| Maximum: |            | 5.0  | 5.0  | 50.0 |       |         |          |
| Mass     | Calc. Mass | mDa  | PPM  | DBE  | i-FIT | Formula |          |
| 221.1400 | 221.1402   | -0.2 | -0.9 | 5.5  | 66.8  | C11     | H17 N4 O |
|          | 221.1389   | 1.1  | 5.0  | 0.5  | 88.4  | C10     | H21 O5   |

6-(Benzyloxy)-9-phenethyl-8-phenyl-9*H*-purine (**6g**). <sup>1</sup>H-NMR (400 MHz, CDCl<sub>3</sub>): δ 8.58 (1H, s, CH), 7.60 – 7.53 (2H, m, 2 x CH), 7.52 – 7.41 (3H, m, 3 x CH), 7.39 – 7.24 (5H, m, 5 x CH), 7.21 – 7.13 (3H, m, 3 x CH), 6.96 – 6.87 (2H, m, 2 x CH), 5.71 (2H, s, OCH<sub>2</sub>), 4.56 (2H, t, *J* = 7.4 Hz, CH<sub>2</sub>), 3.10 (2H, t, *J* = 7.4 Hz, CH<sub>2</sub>). <sup>13</sup>C-NMR (126 MHz, CDCl<sub>3</sub>): δ 161.23 (C), 158.80 (C), 154.40 (CH), 139.32 (C), 137.42 (C), 136.96 (C), 131.17 (CH), 129.89 (C), 129.12 (2 x CH), 128.81 (2 x CH), 128.78 (2 x CH), 128.66 (2 x CH), 128.34 (2 x CH), 128.13 (CH), 127.85 (2 x CH), 126.59 (CH), 111.10 (C), 68.25 (CH<sub>2</sub>), 42.36 (CH<sub>2</sub>), 36.18 (CH<sub>2</sub>). HRMS (ES + ve), C<sub>26</sub>H<sub>23</sub>N<sub>4</sub>O (M + H)<sup>+</sup>: Calculated 407.1872. Obtained 407.1848.

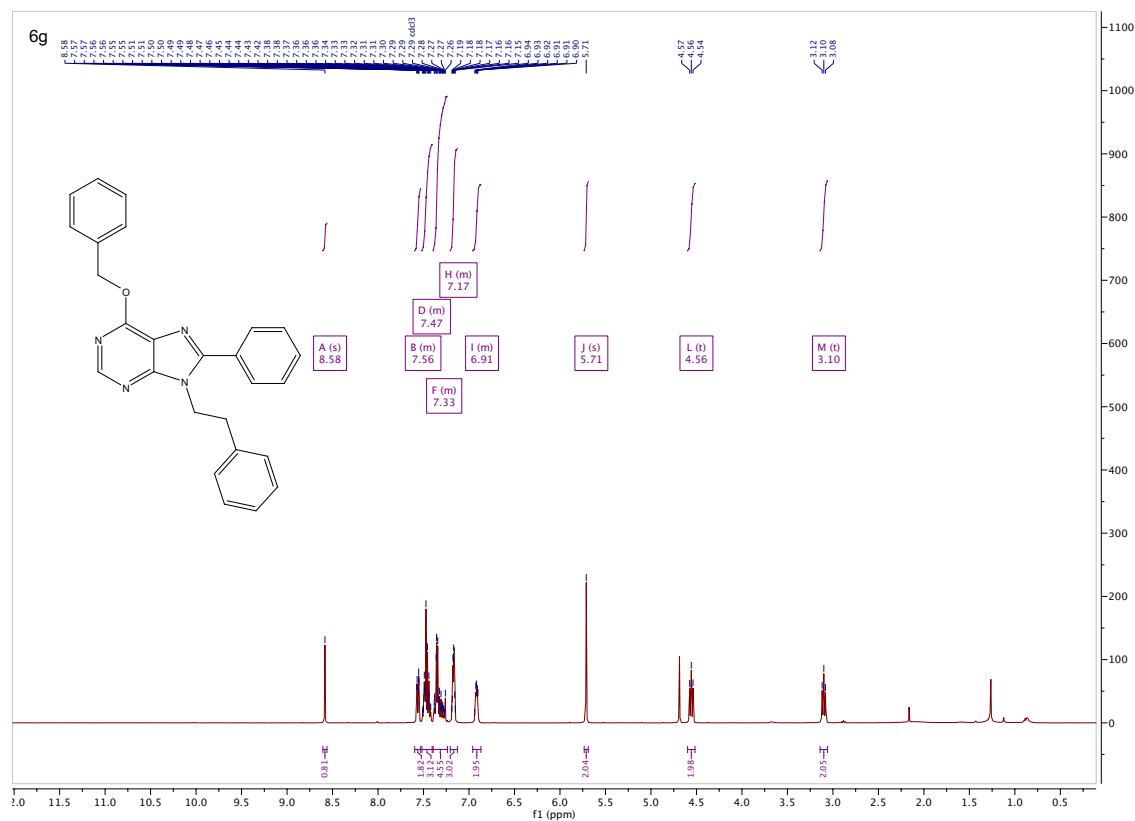



9-*tert*-butyl-6-(benzyloxy)-8-phenyl-9*H*-purine (**6D**).  $^1\text{H}$  NMR (300 MHz,  $\text{CDCl}_3$ )  $\delta$  8.55 (s, 1H), 7.58 – 7.51 (m, 2H), 7.44 (q,  $J = 6.4, 5.5$  Hz, 5H), 7.37 – 7.27 (m, 3H), 5.65 (s, 2H), 1.66 (s, 9H).  $^{13}\text{C}$  NMR (75 MHz,  $\text{CDCl}_3$ )  $\delta$  160.52, 154.43, 153.27, 150.36, 136.48, 134.87, 130.01, 129.62, 128.75, 128.48, 128.17, 127.99, 121.66, 68.33, 60.95, 31.04. HRMS (ES + ve),  $\text{C}_{22}\text{H}_{23}\text{N}_4\text{O}$  ( $\text{M} + \text{H}$ ) $^+$ : Calculated 359.1872. Obtained 359.1875.

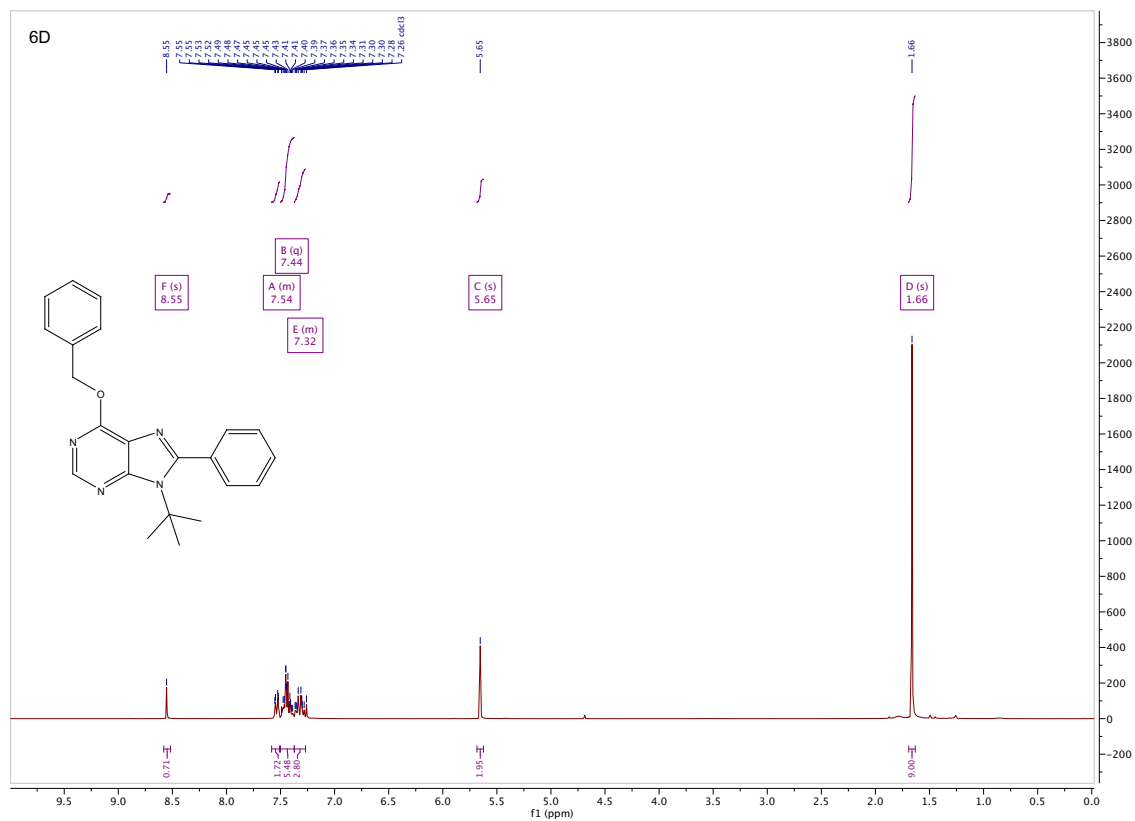

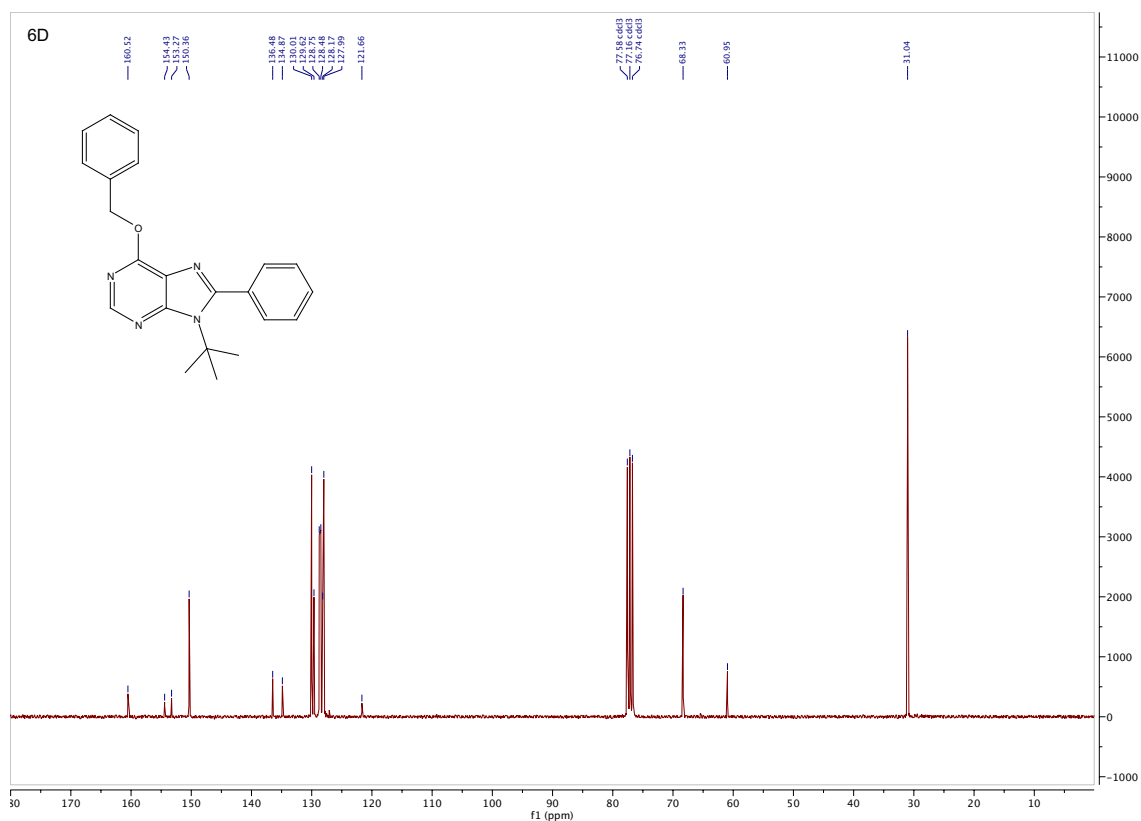

# Elemental Composition Report

Page 1

## Single Mass Analysis

Tolerance = 10.0 PPM / DBE: min = -1.5, max = 50.0

Element prediction: Off

Number of isotope peaks used for i-FIT = 3

Monoisotopic Mass, Even Electron Ions

635 formula(e) evaluated with 4 results within limits (up to 50 closest results for each mass)

Elements Used:

C: 0-22 H: 0-1000 N: 0-5 O: 0-20 Na: 0-1

ASIMJ-27.9 (0.195) AM (Cen, 5, 40.00, Ht, 5000.0, 0.00, 1.00)

1: TOF MS ES+

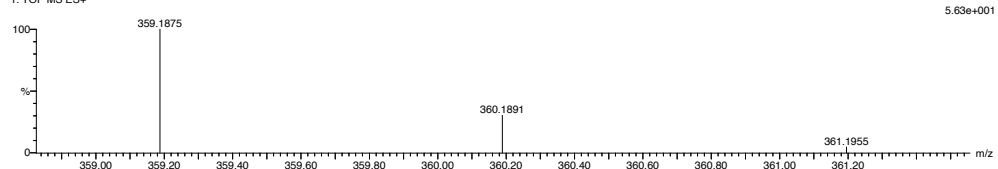

Minimum: -1.5  
Maximum: 5.0 10.0 50.0

| Mass     | Calc. Mass | mDa  | PPM  | DBE  | i-FIT | i-FIT (Norm) | Formula          |
|----------|------------|------|------|------|-------|--------------|------------------|
| 359.1875 | 359.1872   | 0.3  | 0.8  | 13.5 | 5.4   | 0.9          | C22 H23 N4 O     |
|          | 359.1858   | 1.7  | 4.7  | 8.5  | 5.7   | 1.2          | C21 H27 O5       |
|          | 359.1848   | 2.7  | 7.5  | 10.5 | 6.0   | 1.5          | C20 H24 N4 O Na  |
|          | 359.1907   | -3.2 | -8.9 | 1.5  | 7.3   | 2.8          | C13 H28 N4 O6 Na |
